# Supplementary material
Source: publisher figshare collection journal article supplement (https://acs.figshare.com/ndownloader/files/22441616)
Supplement: Supplementary file 1 [file 22441616]

## Supporting Information

### Spatial Recognition Within Terpenes: Redox and H-bond Promoted Linkage Isomerizations and the Selective Binding of Complex Alkenes

Steven J. Dakermanji, Karl S. Westendorff, Emmit K. Pert, Katy B. Wilson, Jeffery T. Myers, Justin H. Wilde, Diane A. Dickie, Kevin D. Welch, and W. Dean Harman\*

*University of Virginia, Department of Chemistry, Charlottesville, VA 22904*

#### Table of Contents

|                                                                                                                |            |
|----------------------------------------------------------------------------------------------------------------|------------|
| <b>General Methods.....</b>                                                                                    | <b>S2</b>  |
| <b>Compounds:</b>                                                                                              |            |
| <b>MoTp(NO)(DMAP)(<math>\eta^2</math>-Trans-3-hexene) (3)</b>                                                  | <b>S3</b>  |
| <b>(MoTp(NO-Me)(DMAP)(<math>\eta^2</math>-Trans-3-Hexene))(OTf) (3•CH<sub>3</sub>)</b>                         | <b>S6</b>  |
| <b>WTp(NO)(PMe<sub>3</sub>)(<math>\eta^2</math>-Trans-3-hexene) (4)</b>                                        | <b>S8</b>  |
| <b>MoTp(NO)(DMAP)(<math>\eta^2</math>-<i>R</i>-limonene) (9)</b>                                               | <b>S12</b> |
| <b>Mo<sub>R</sub>Tp(NO)(DMAP)(<math>\eta^2</math>-<i>R</i>-limonene) (<i>R,R</i>)- 9A</b>                      | <b>S14</b> |
| <b>Mo<sub>S</sub>Tp(NO)(DMAP)(<math>\eta^2</math>-<i>R</i>-limonene) (<i>S,R</i>)- 9A</b>                      | <b>S15</b> |
| <b>WTp(NO)(PMe<sub>3</sub>)(<math>\eta^2</math>-<i>R</i>-limonene) (<i>R,R</i>)- 10A and (<i>S,R</i>)- 10A</b> | <b>S16</b> |
| <b>MoTp(NO)(DMAP)(<math>\eta^2</math>-<math>\alpha</math>-humulene) (12)</b>                                   | <b>S20</b> |
| <b>(MoTp(NO-Me)(DMAP)(<math>\eta^2</math>-<math>\alpha</math>-Humulene))(OTf) (12A•CH<sub>3</sub>)</b>         | <b>S23</b> |
| <b>WTp(NO)(PMe<sub>3</sub>)(<math>\eta^2</math> <math>\alpha</math>-humulene) (13)</b>                         | <b>S25</b> |
| <b>MoTp(NO)(DMAP)(<math>\eta^2</math>-Cyclopentene) (14)</b>                                                   | <b>S28</b> |
| <b>Crystallography information (9a and 14)</b>                                                                 | <b>S30</b> |

## General Methods

NMR spectra were obtained on a 600 or 800 MHz spectrometer. All chemical shifts are reported in ppm, and proton and carbon shifts are referenced to tetramethylsilane (TMS) utilizing residual  $^1\text{H}$  or  $^{13}\text{C}$  signals of the deuterated solvents as an internal standard. Coupling constants ( $J$ ) are reported in hertz (Hz). Infrared spectra (IR) were recorded as a glaze on a spectrometer fitted with a horizontal attenuated total reflectance (HATR) accessory or on a diamond anvil ATR assembly. Electrochemical experiments were performed under a nitrogen atmosphere. Cyclic voltammetry data were taken at ambient temperature ( $\sim 25^\circ\text{C}$ ) at 100 mV/s in a standard three-electrode cell with a glassy-carbon working electrode, N,N-dimethylacetamide (DMA) or acetonitrile ( $\text{CH}_3\text{CN}$ ) solvent (unless otherwise specified), and tetrabutylammonium hexafluorophosphate (TBAH) electrolyte (approximately 0.5 M). All potentials are reported versus NHE (normal hydrogen electrode) using cobaltocenium hexafluorophosphate ( $E_{1/2} = -0.78$  V), ferrocene ( $E_{1/2} = +0.55$  V), or decamethylferrocene ( $E_{1/2} = +0.04$  V) as internal standard. The peak-to-peak separation was approximately 100 mV for all reversible couples. Unless otherwise noted, all synthetic reactions were performed in a glove box under a dry nitrogen atmosphere. Deuterated solvents were used as received. Pyrazole (Pz) protons of the hydrido tris(pyrazolyl)borate(Tp) ligand were uniquely assigned (e.g., "PzB3") using a combination of two-dimensional NMR data. When unambiguous assignments were not possible, Tp protons were labeled as "Pz3/5 or Pz4". All  $J$  values for Pz protons are  $2(\pm 0.2)$  Hz. BH peaks (around 4–5 ppm) are not identified due to their quadrupole broadening; IR data are used to confirm the presence of a BH group (around  $2500\text{ cm}^{-1}$ ).

**Figure S1.**  $^1\text{H}$  NMR of  $\text{MoTp}(\text{NO})(\text{DMAP})(\eta^2\text{-trans-3-hexene})$  (**3**)

( $\text{d}^6\text{-Acetone}$ )

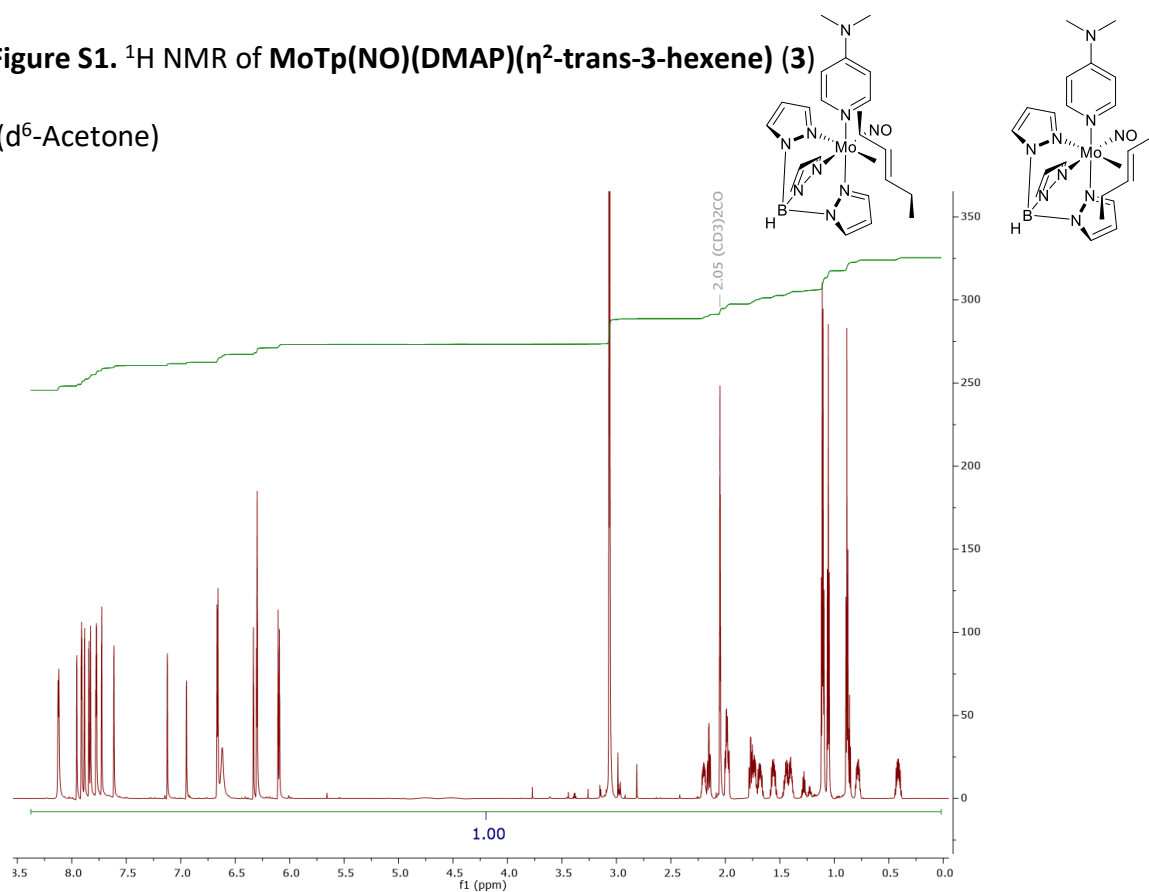

**Figure S2.**  $^{13}\text{C}$  NMR ( $\text{d}^6\text{-Acetone}$ ) of **3**

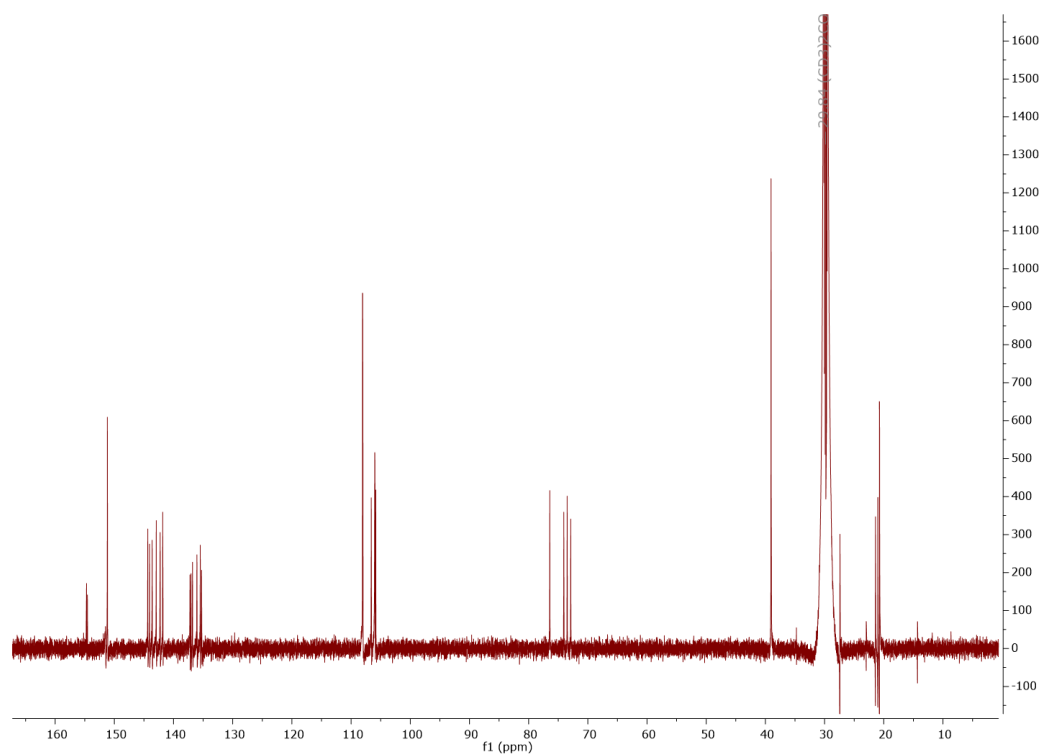

**Figure S3.**  $^1\text{H}$  NMR ( $\text{d}^6$ -Acetone) of **3B**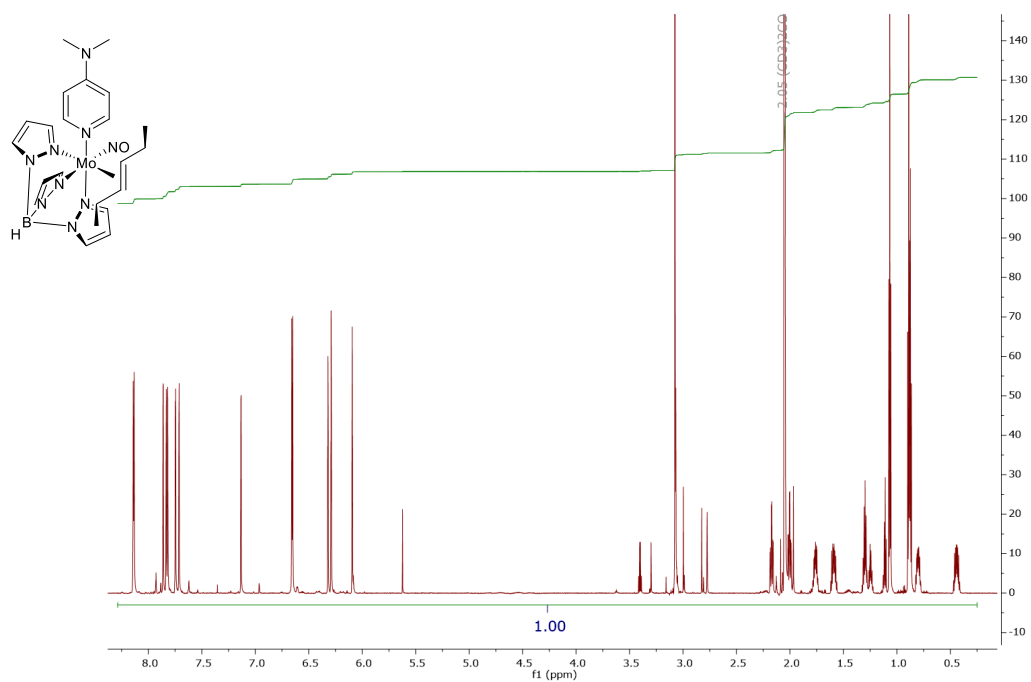**Figure S4.**  $^1\text{H}$  NMR  $^{13}\text{C}$  NMR ( $\text{d}^6$ -Acetone) of **3B**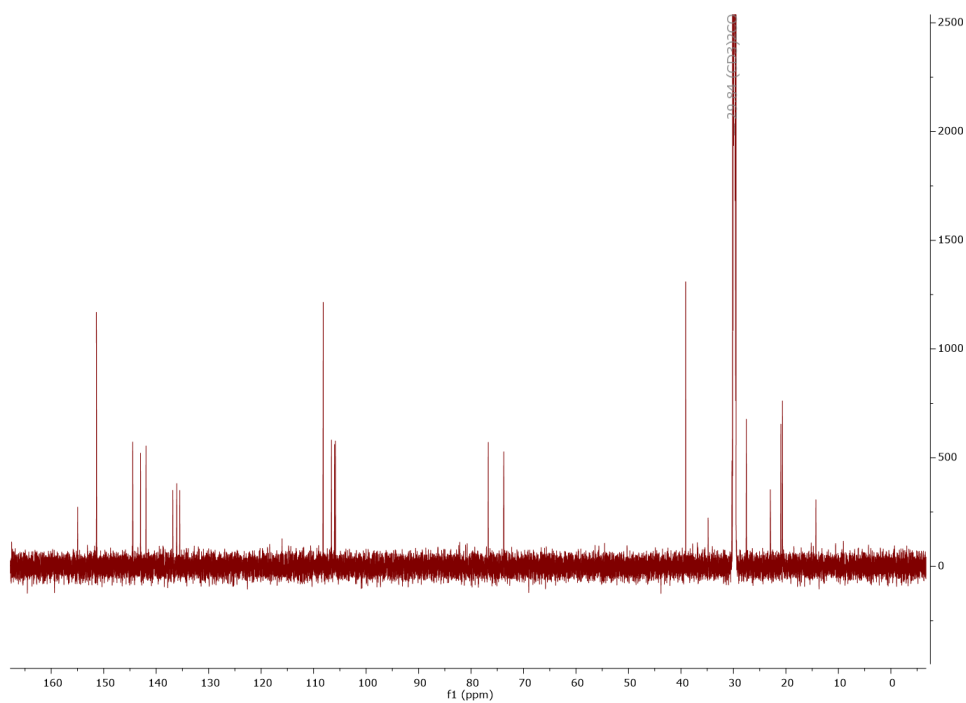

Figure S5. CV of 3

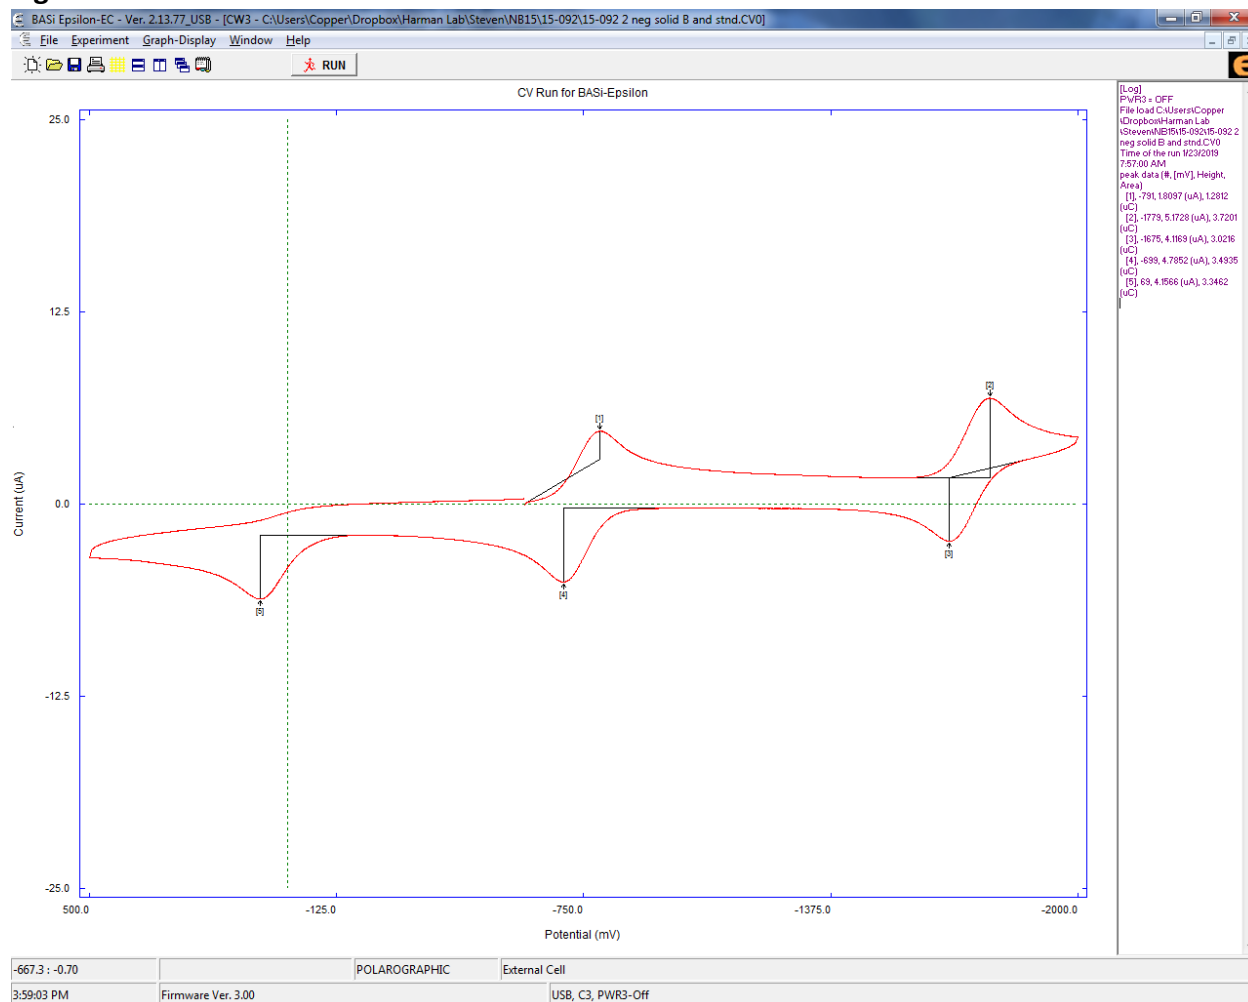

Figure S6. IR of 3

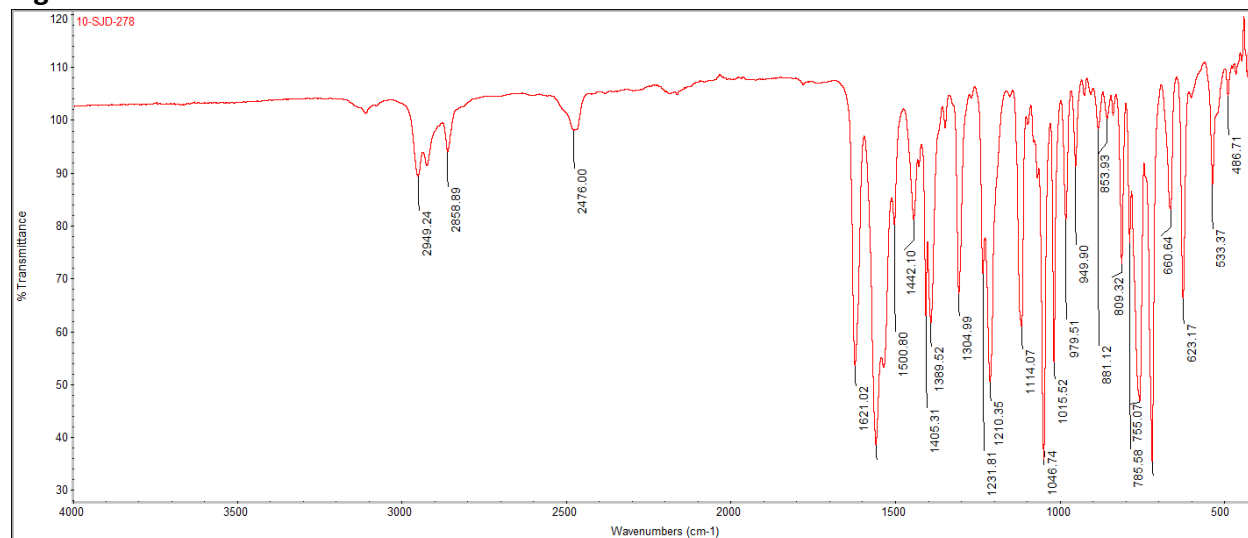

**(MoTp(NO-Me)(DMAP)( $\eta^2$ -3-Trans-Hexene))(OTf) (**3**•CH<sub>3</sub>)**

**Figure S7.** <sup>1</sup>H NMR (d<sup>6</sup>-Acetone) of

**Figure S8.** <sup>13</sup>C NMR (d<sup>6</sup>-Acetone) of

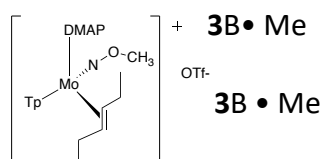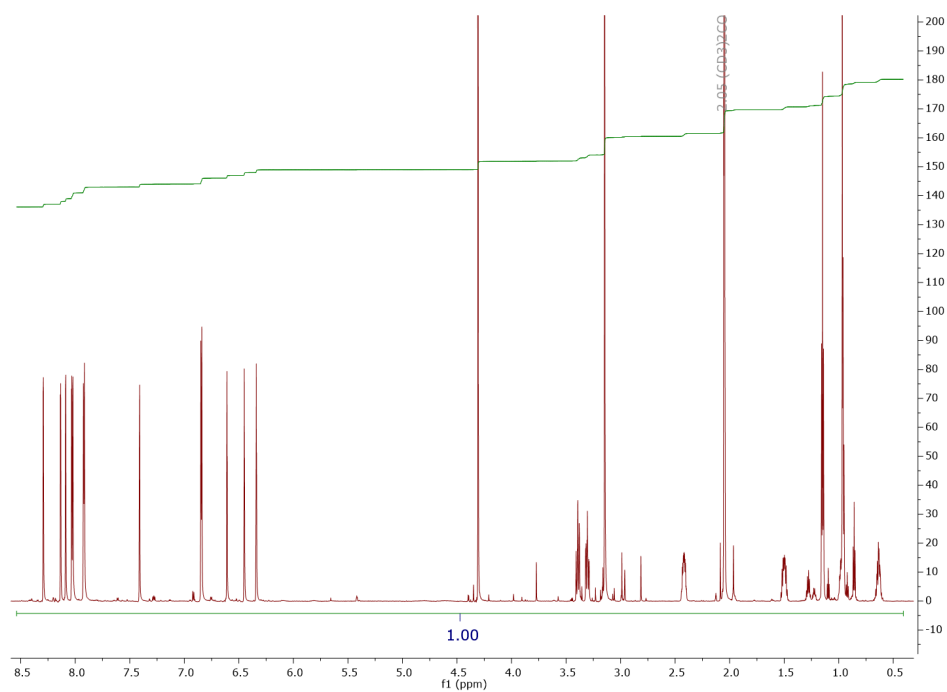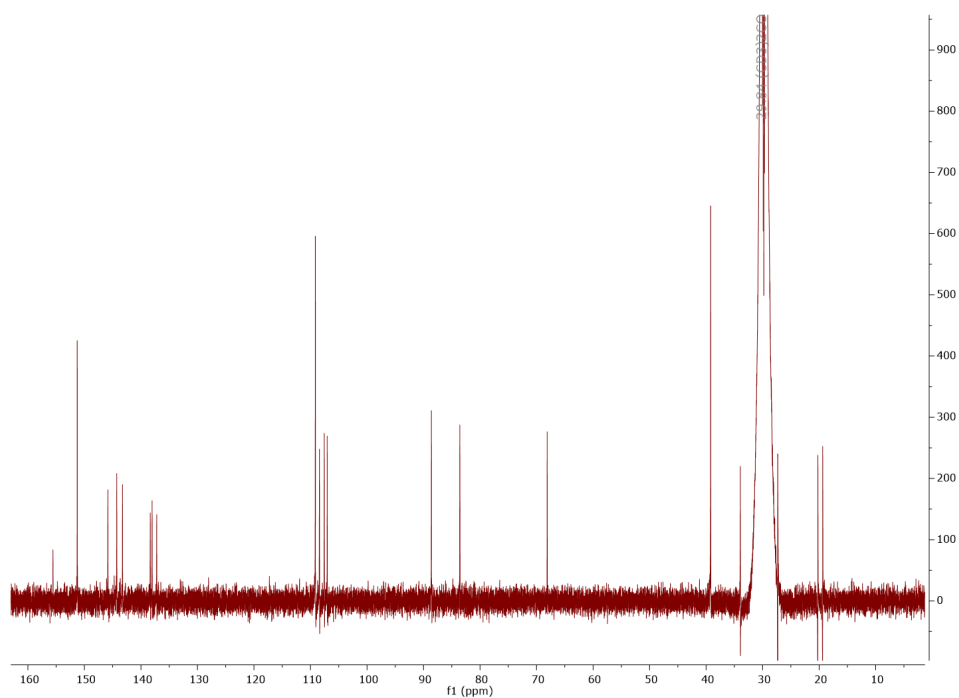

Figure S9. CV of  $3A \bullet CH_3$ 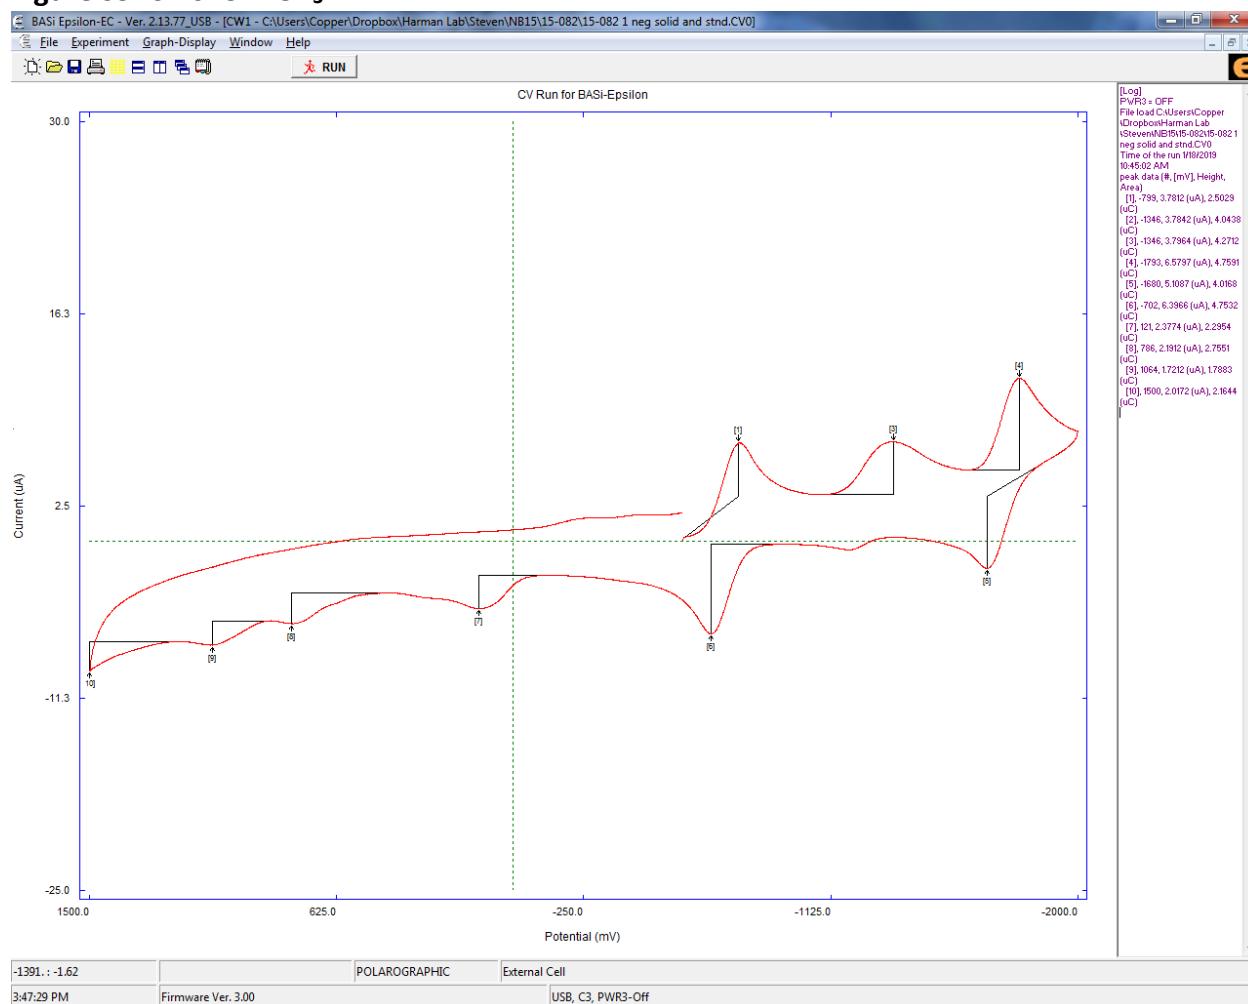Figure S10. IR of  $3A \bullet CH_3$ 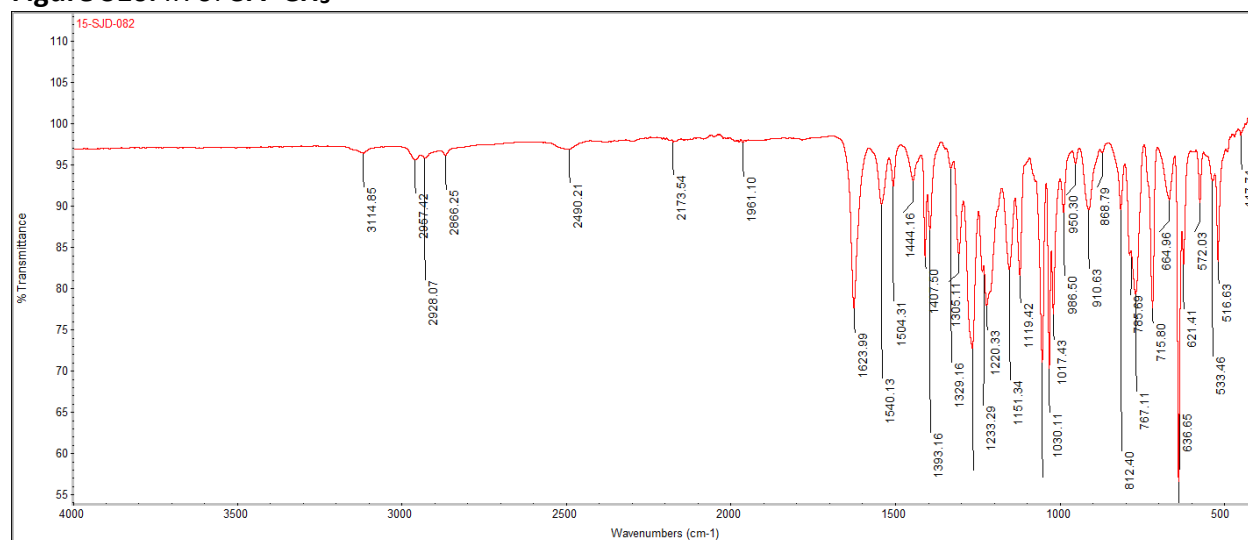

**WTp(NO)(PMe<sub>3</sub>)( $\eta^2$ -trans-3-hexene) (4)****Figure S11.** <sup>1</sup>H NMR (d<sup>6</sup>-Acetone) of 4A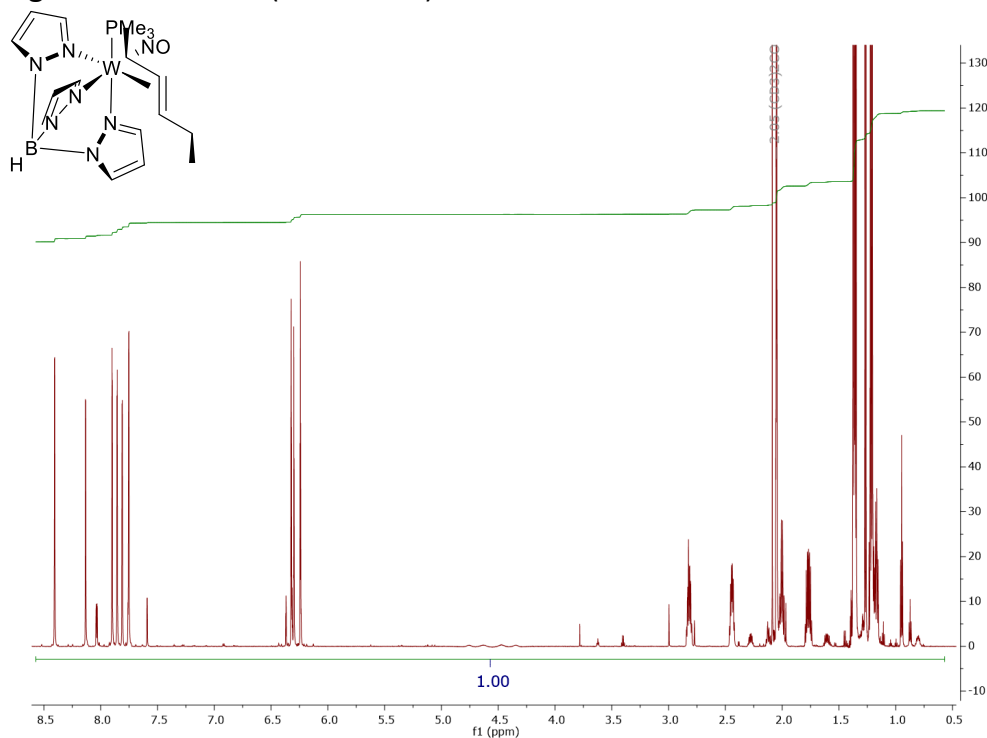**Figure S12.** <sup>13</sup>C NMR (d<sup>6</sup>-Acetone) of 4A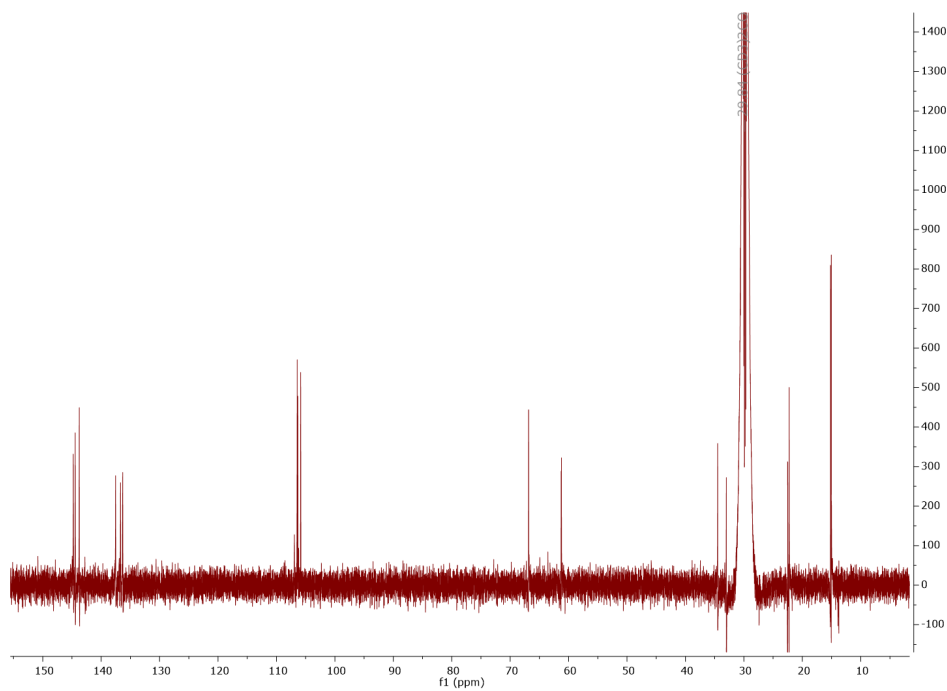



**Figure S13.**  $^1\text{H}$  NMR ( $\text{d}^6$ -Acetone) of **4B**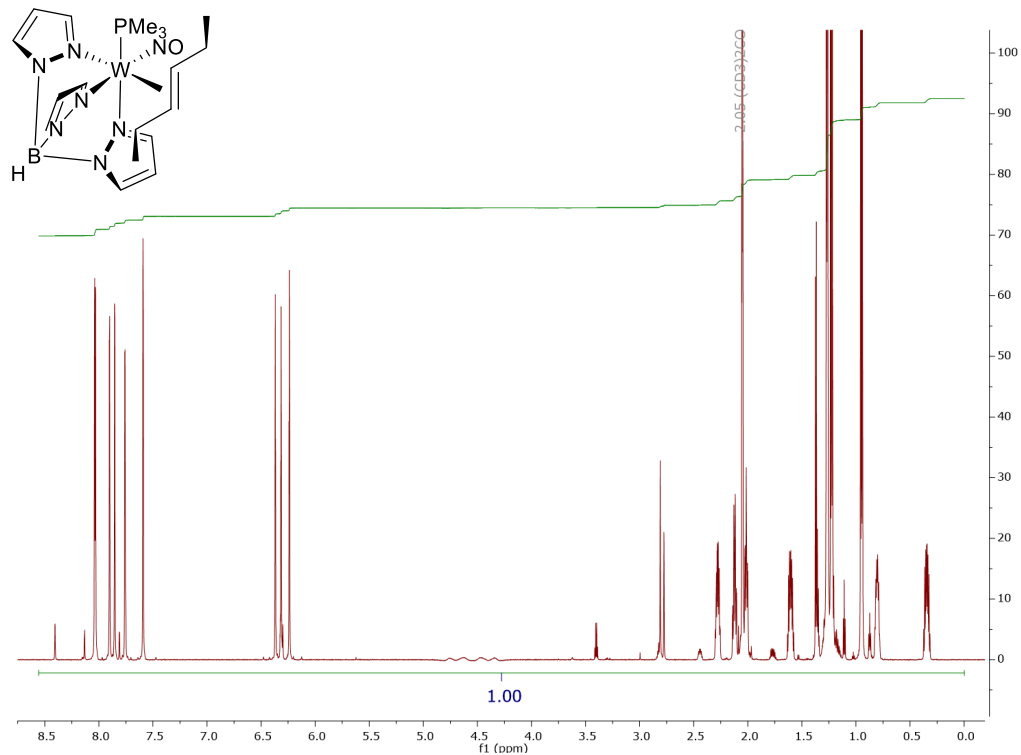**Figure S14.**  $^{13}\text{C}$  NMR ( $\text{d}^6$ -Acetone) of **4B**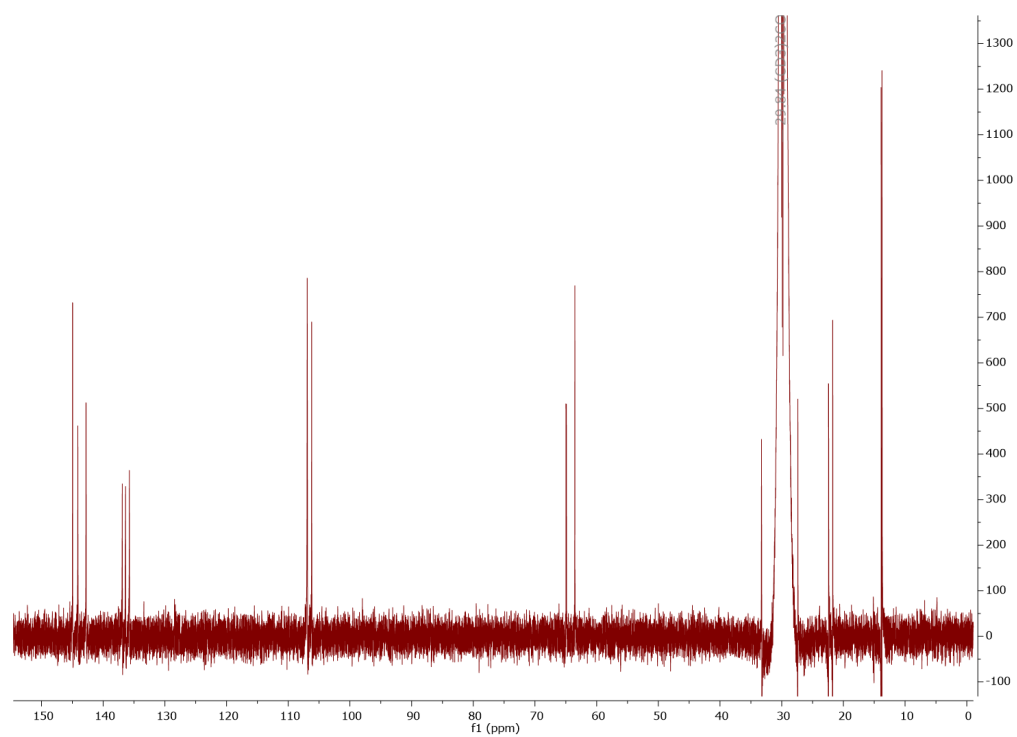

Figure S15. CV of 4A

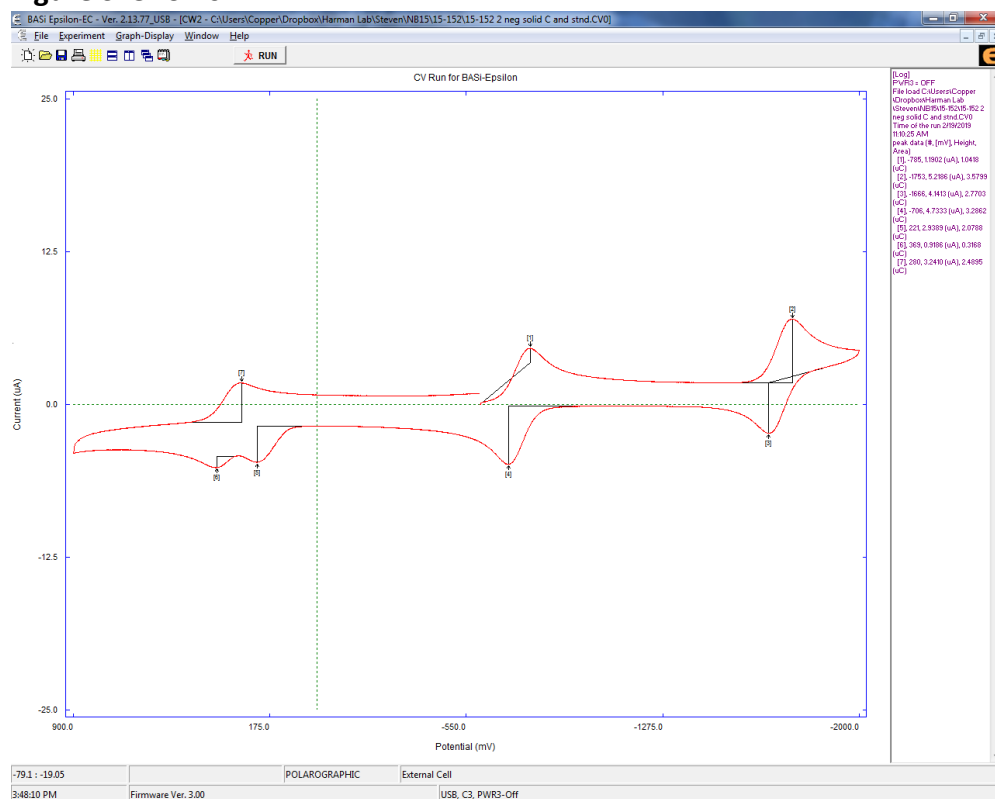

Figure S16. CV of 4B

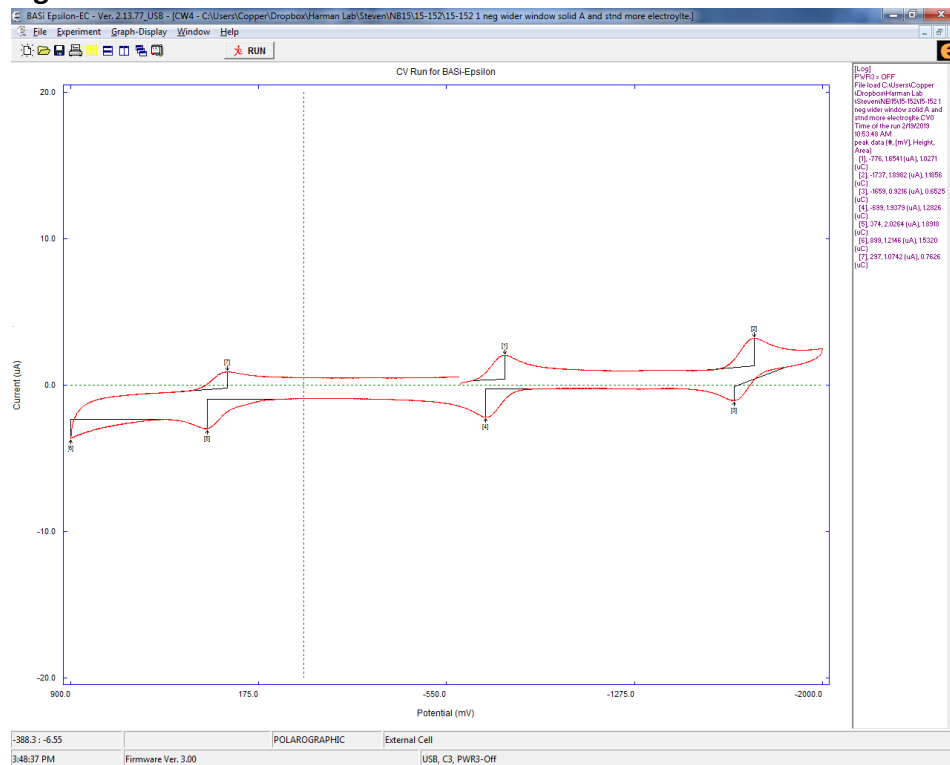

Figure S17. IR of 4A

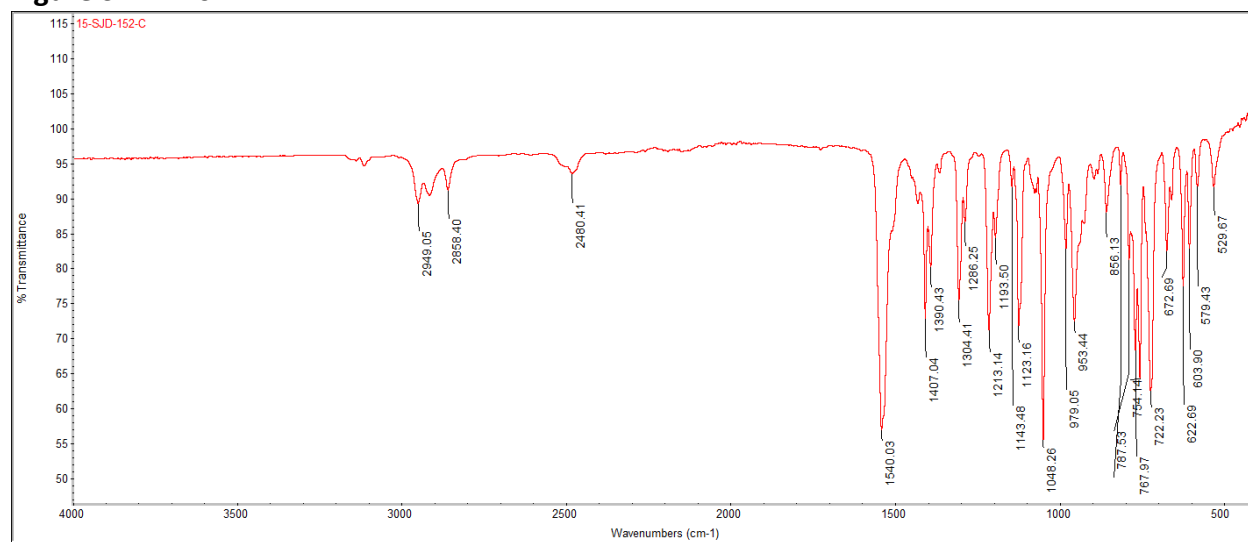

Figure S18. IR of 4B

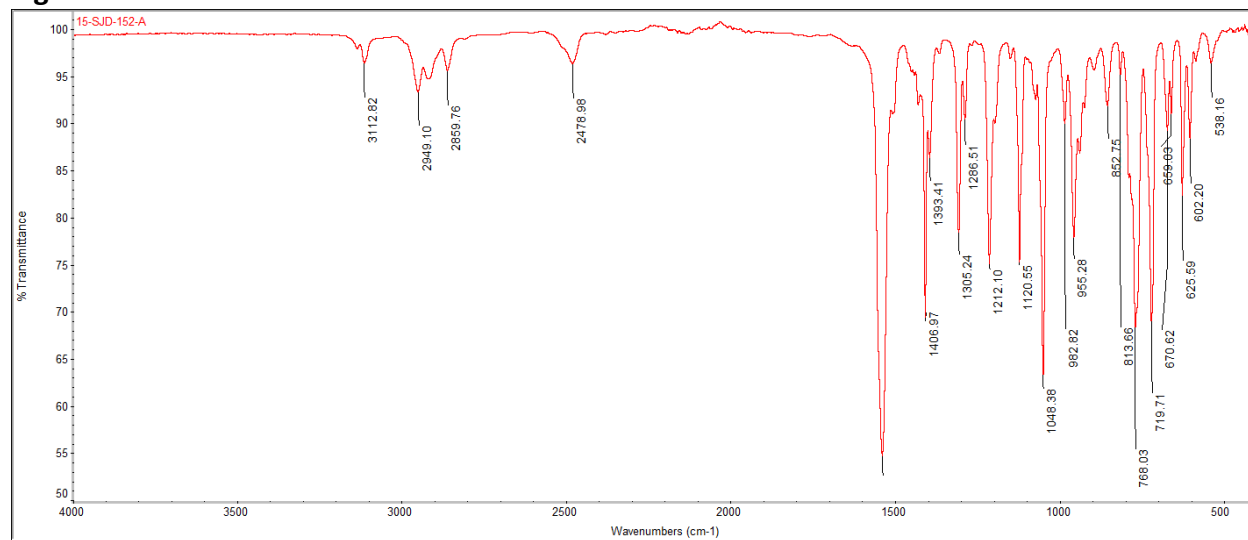

**MoTp(NO)(DMAP)( $\eta^2$ -*R*-limonene) (9)****Figure S19.**  $^1\text{H}$  NMR ( $\text{d}^6$ -Acetone) of **9**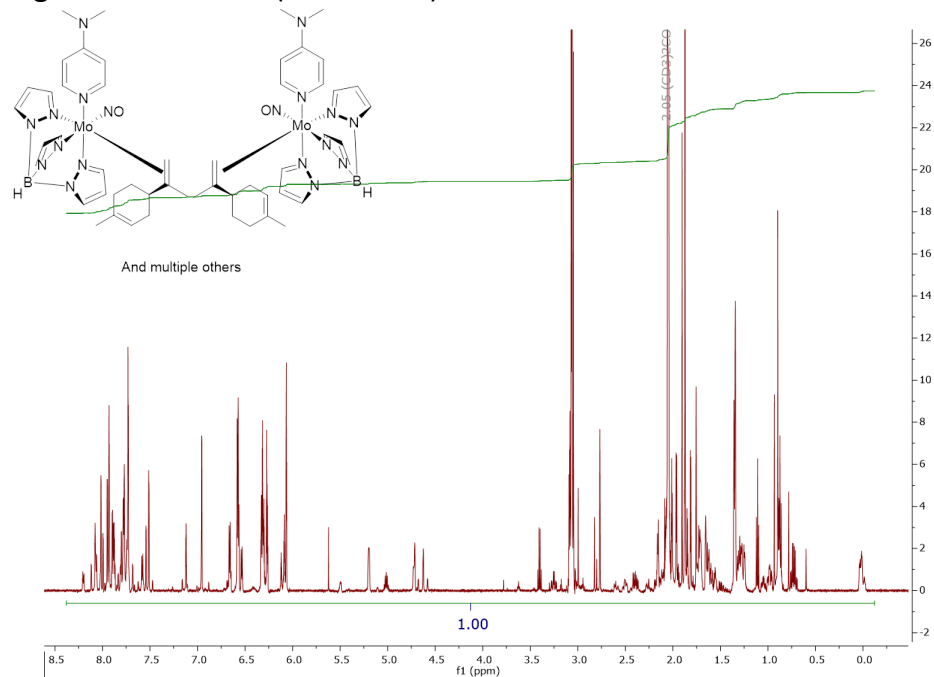**Figure S20.**  $^1\text{H}$  NMR ( $\text{d}^6$ -Acetone) of **9A**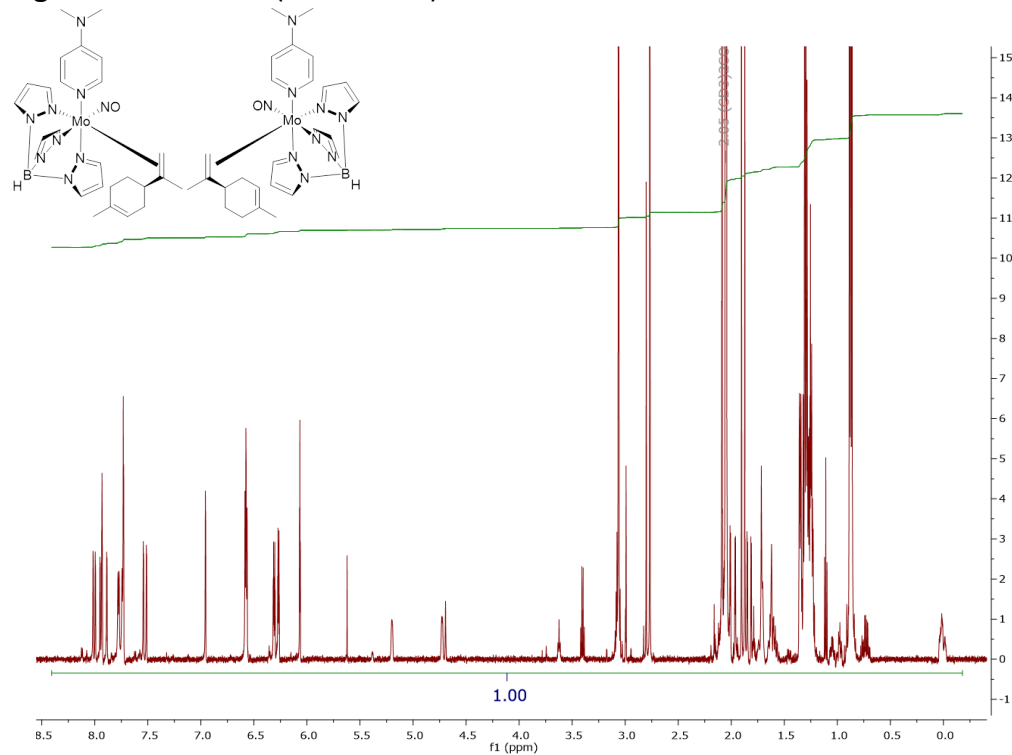

Figure S21. CV of 9

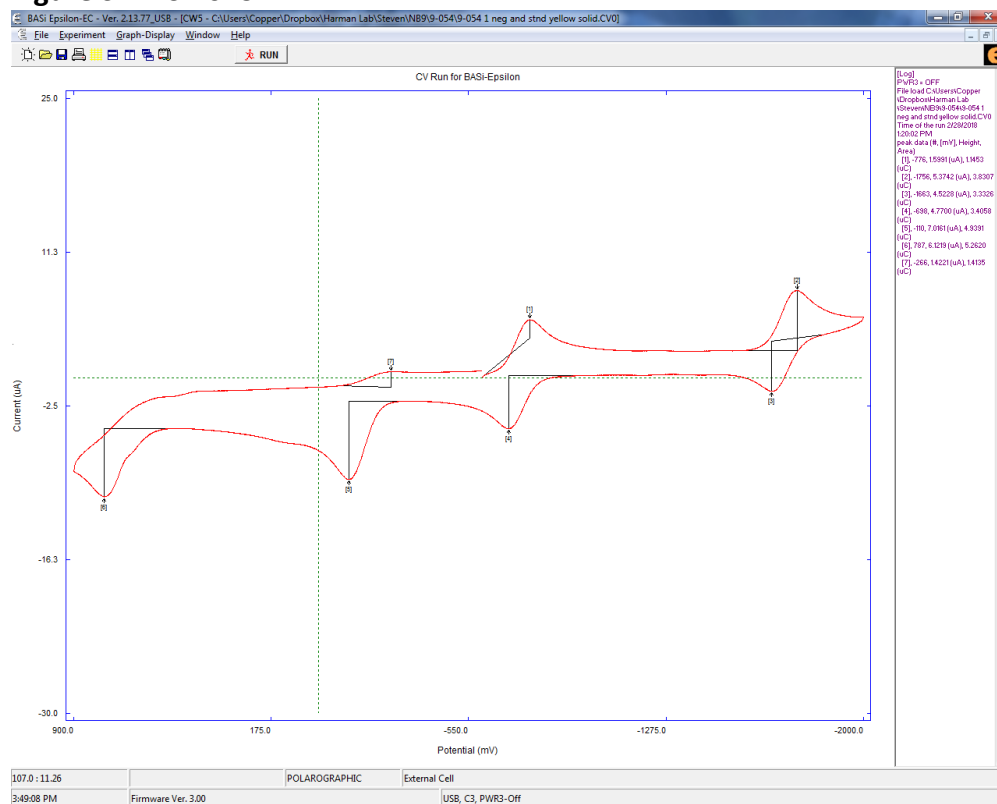

Figure S22. IR of 9

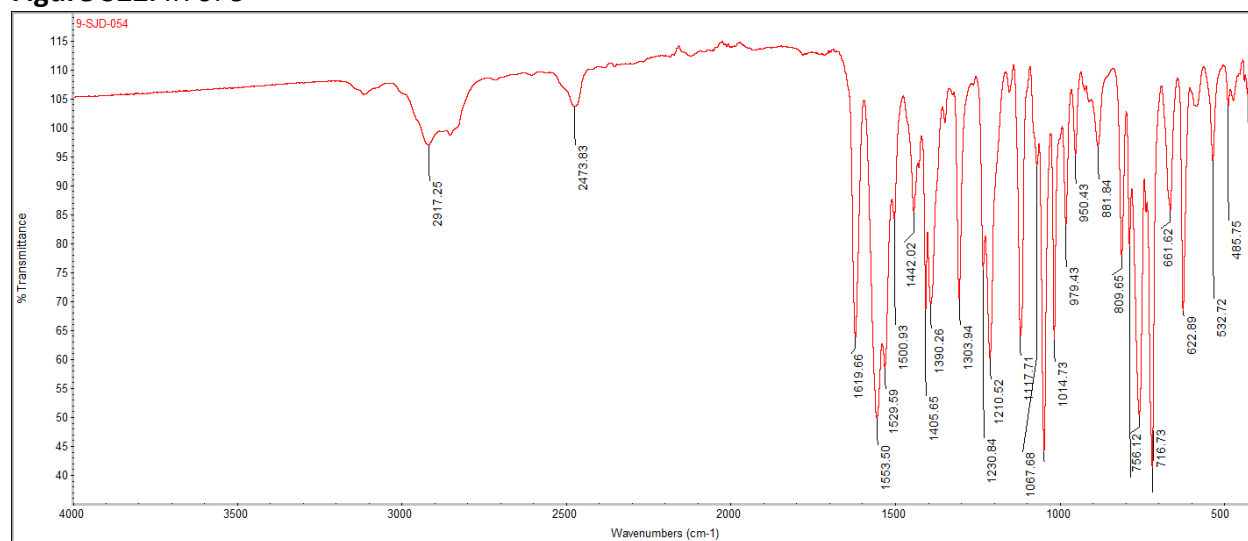

**Mo<sub>R</sub>Tp(NO)(DMAP)( $\eta^2$ -*R*-limonene) (*R,R*)- 9A**

**Figure S23.** <sup>1</sup>H NMR (CD<sub>2</sub>Cl<sub>2</sub>) of *R*<sub>Mo</sub>,*R*-9A (unidentified side product present)

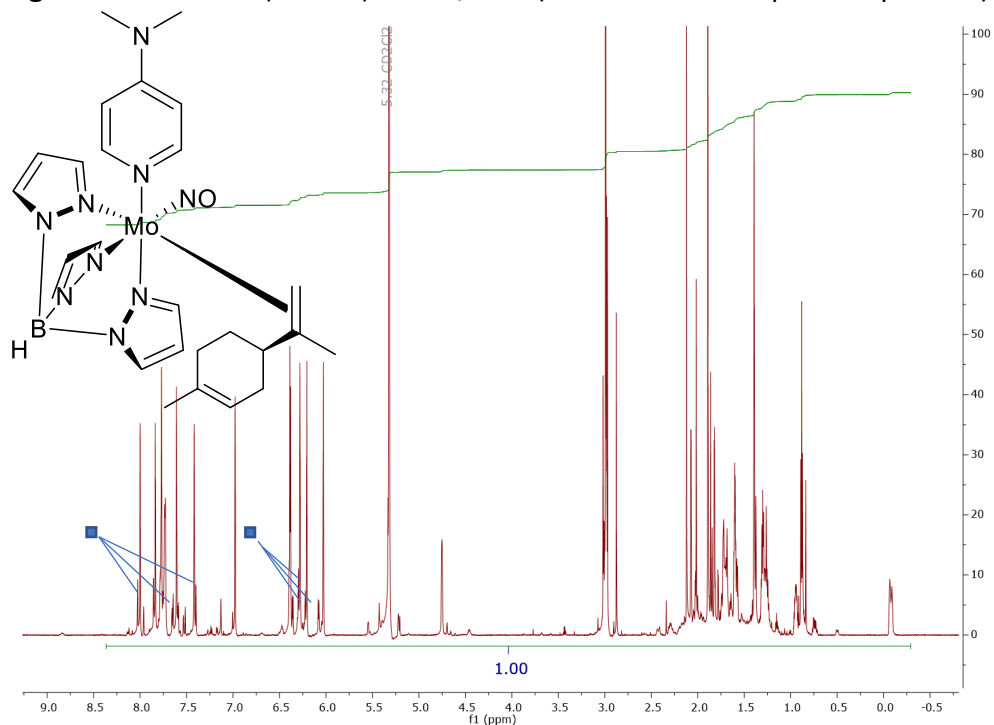

**Figure S24.** <sup>13</sup>C NMR (CD<sub>2</sub>Cl<sub>2</sub>) of *R*<sub>Mo</sub>,*R*-9A (unidentified side product present)

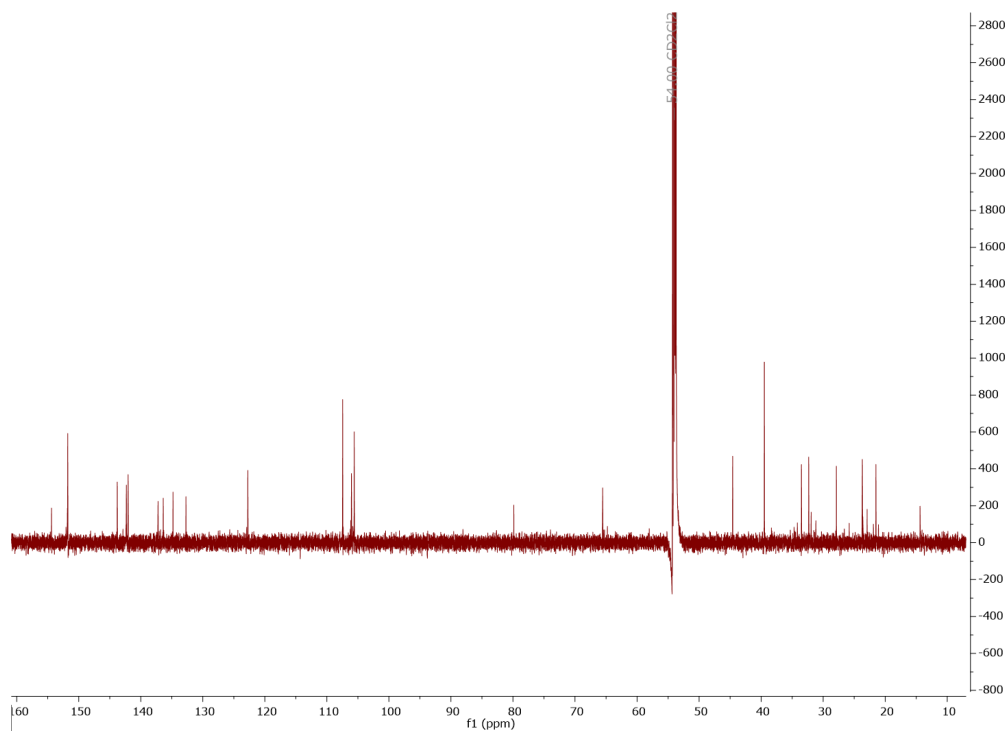

**Mo<sub>5</sub>Tp(NO)(DMAP)( $\eta^2$ -*R*-limonene) (*S,R*)- 9A**

**Figure S25.** <sup>1</sup>H NMR (CD<sub>2</sub>Cl<sub>2</sub>) of *S*<sub>Mo</sub>,*R*-9A (unidentified side product present)

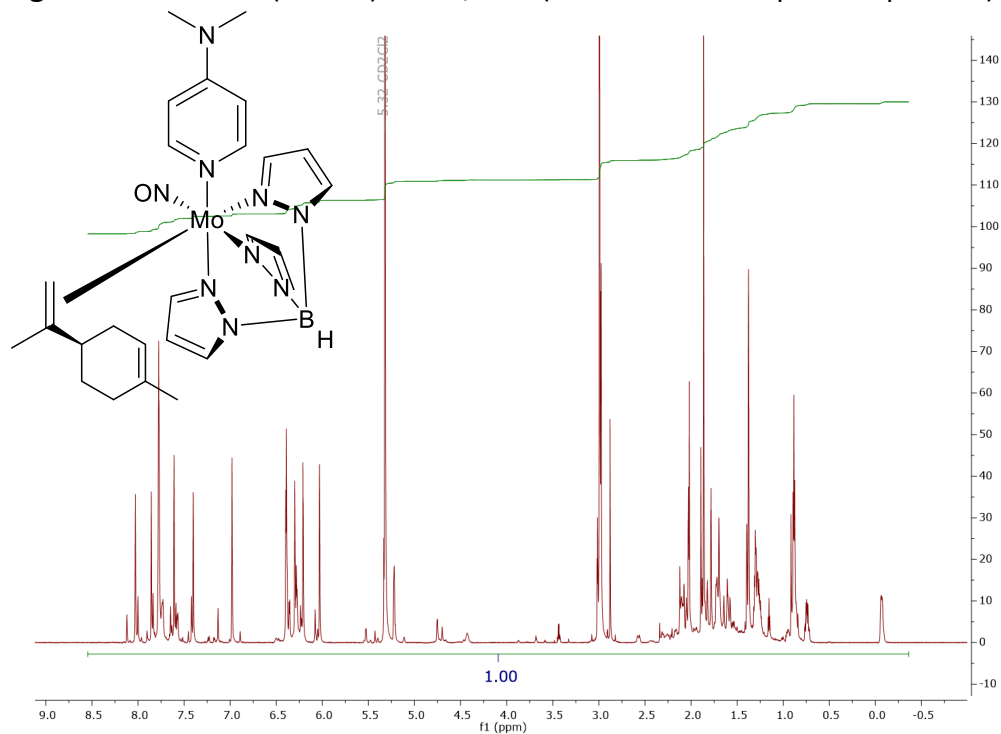

**Figure S26.** <sup>13</sup>C NMR (CD<sub>2</sub>Cl<sub>2</sub>) of *S*<sub>Mo</sub>,*R*-9A (unidentified side product present)

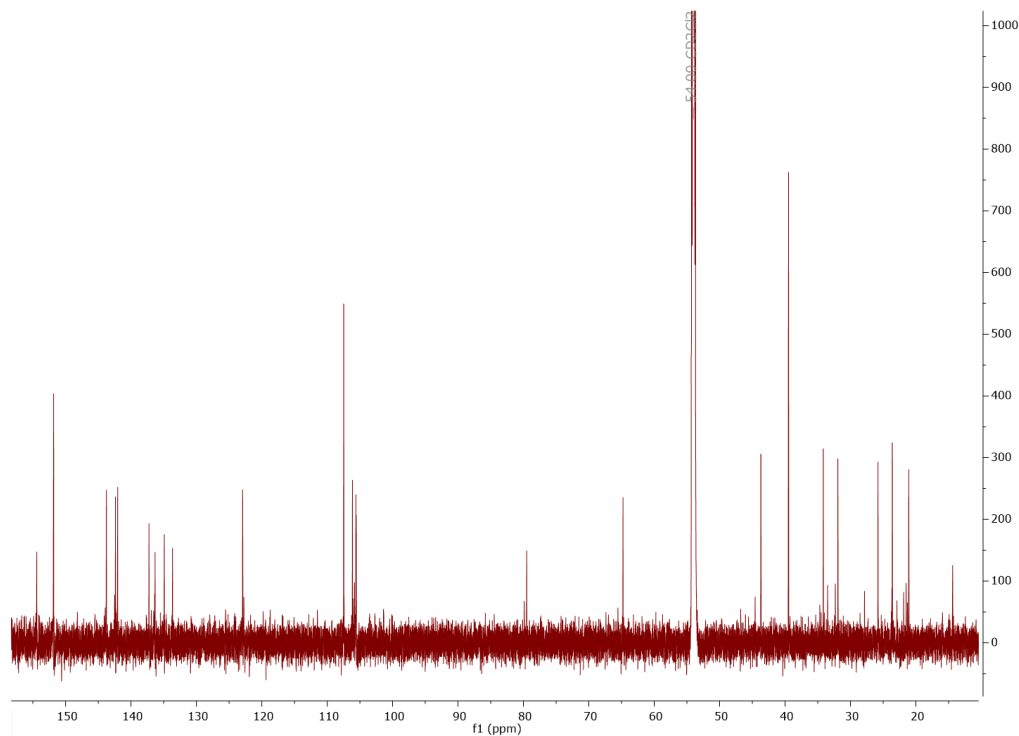

WTp(NO)(PMe<sub>3</sub>)( $\eta^2$ -*R*-limonene) (*R,R*)- **10A** and (*S,R*)- **10A**

Figure S27. <sup>1</sup>H NMR (d<sup>6</sup>-Acetone) of **10**

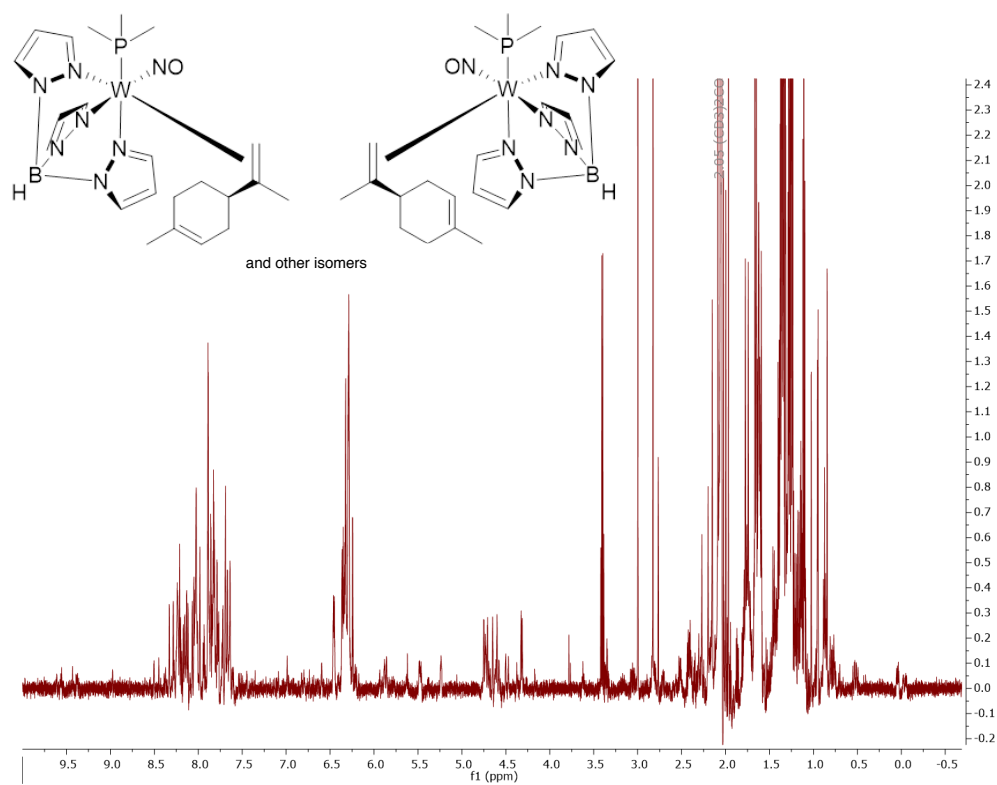



Figure S28. CV of 10

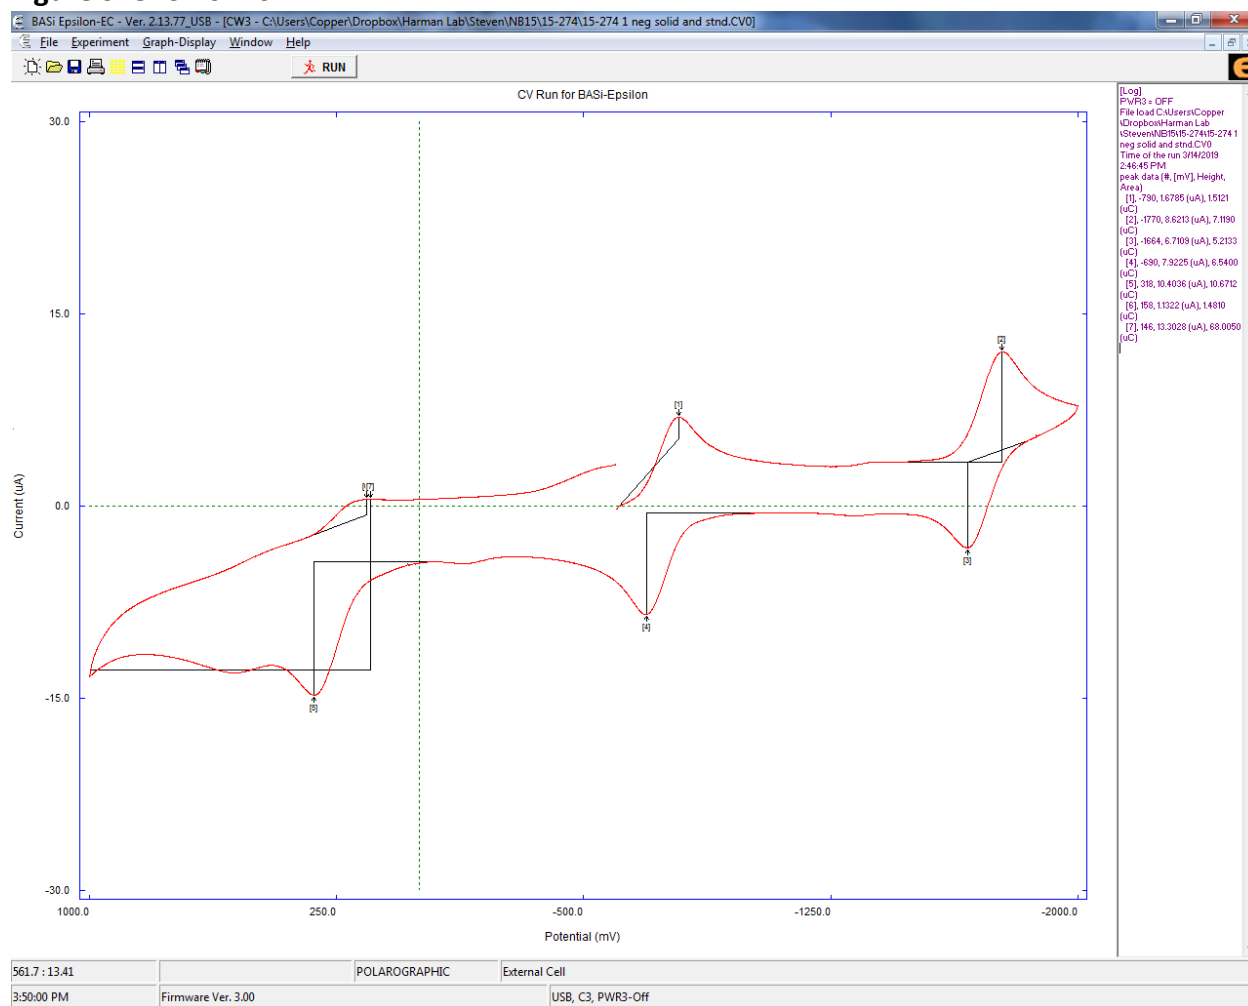

Figure S29. IR of 10

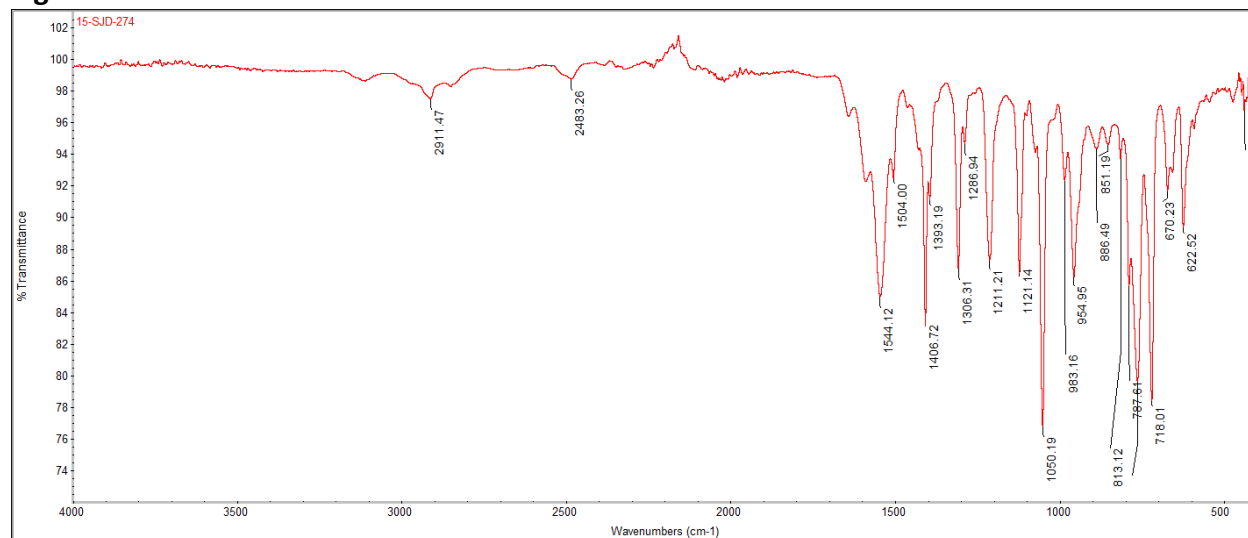

**Figure S30.**  $^1\text{H}$  NMR ( $\text{d}^6$ -Acetone) of  $R_{\text{Mo}},R$ - and  $S_{\text{Mo}},R$ - **10A**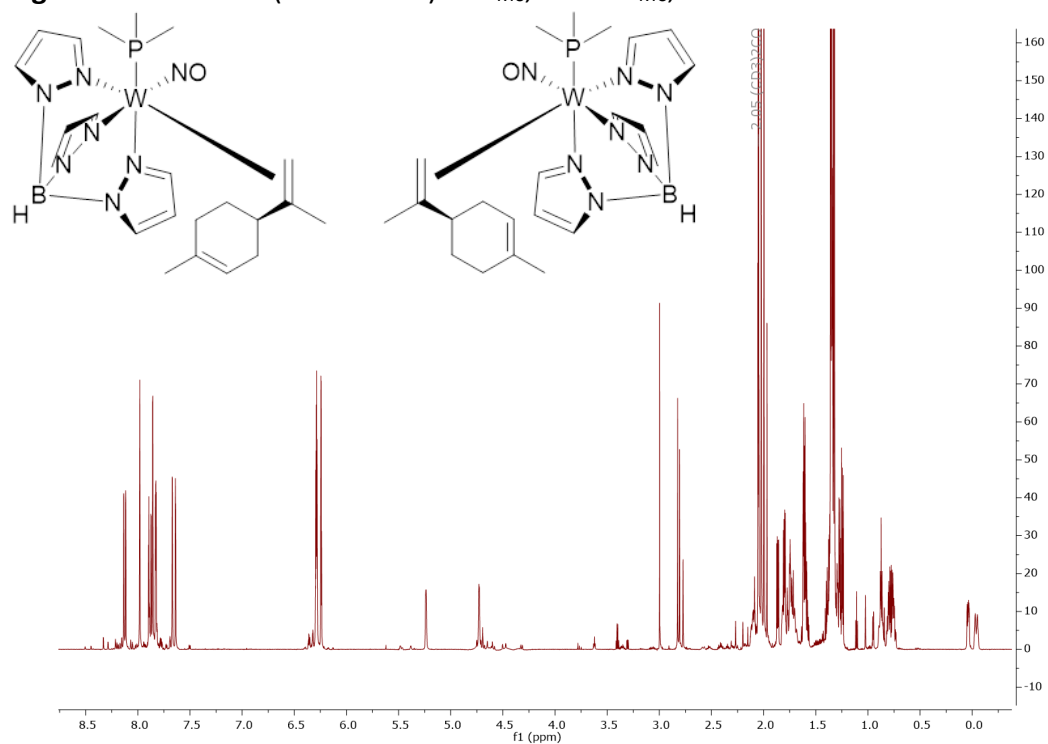**Figure S31.**  $^{13}\text{C}$  NMR ( $\text{d}^6$ -Acetone) of  $R_{\text{Mo}},R$ - and  $S_{\text{Mo}},R$ - **10A**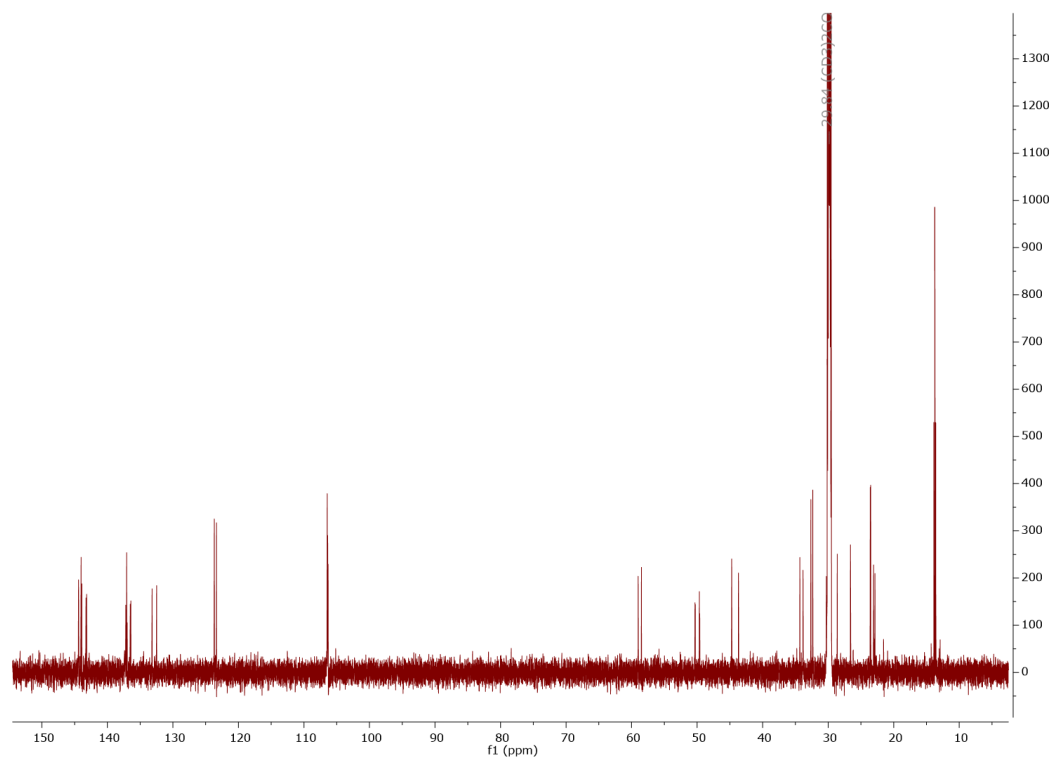

**Figure S32.**  $^1\text{H}$  NMR ( $\text{d}^6$ -Acetone) of  $S_{\text{Mo}},R$ - **10A**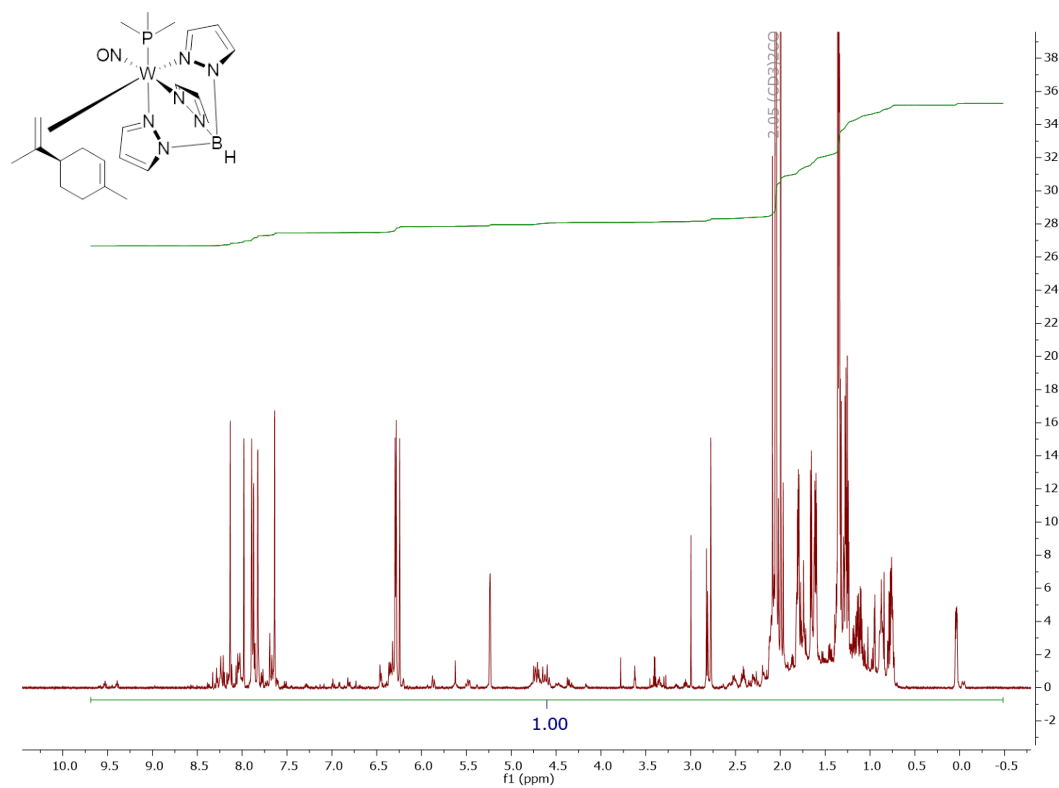**Figure S33.**  $^{13}\text{C}$  NMR ( $\text{d}^6$ -Acetone) of  $S_{\text{Mo}},R$ - **10A**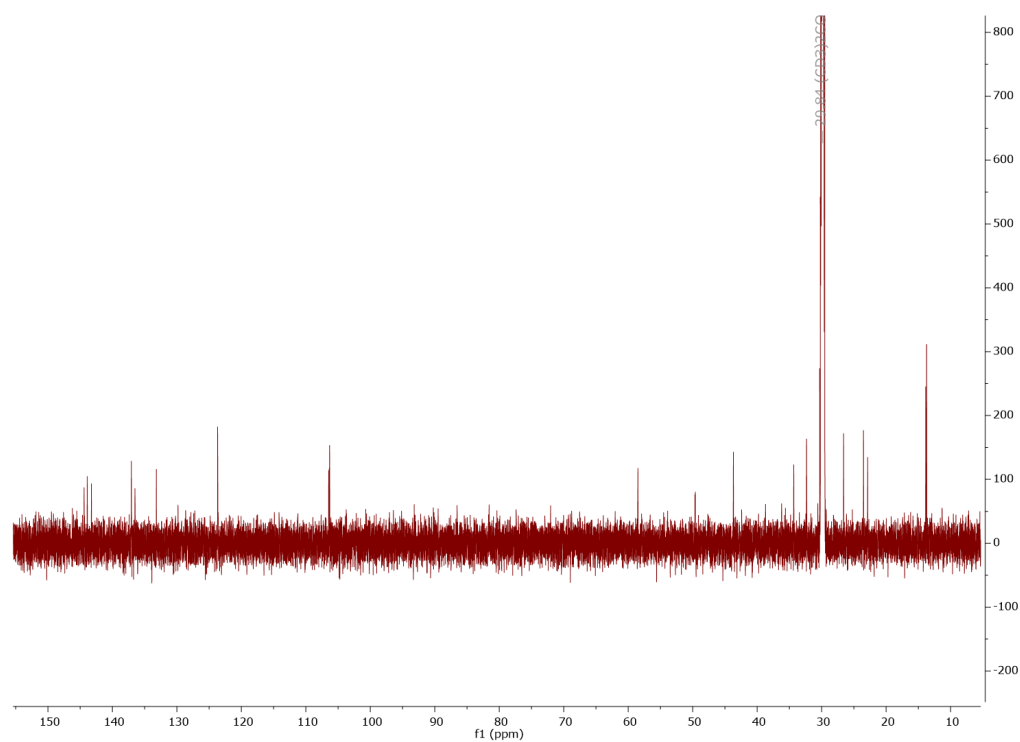

**MoTp(NO)(DMAP)( $\eta^2$ - $\alpha$ -humulene) (12)****Figure S34.**  $^1\text{H}$  NMR ( $d^6$ -Acetone) of **12** mixture of Isomers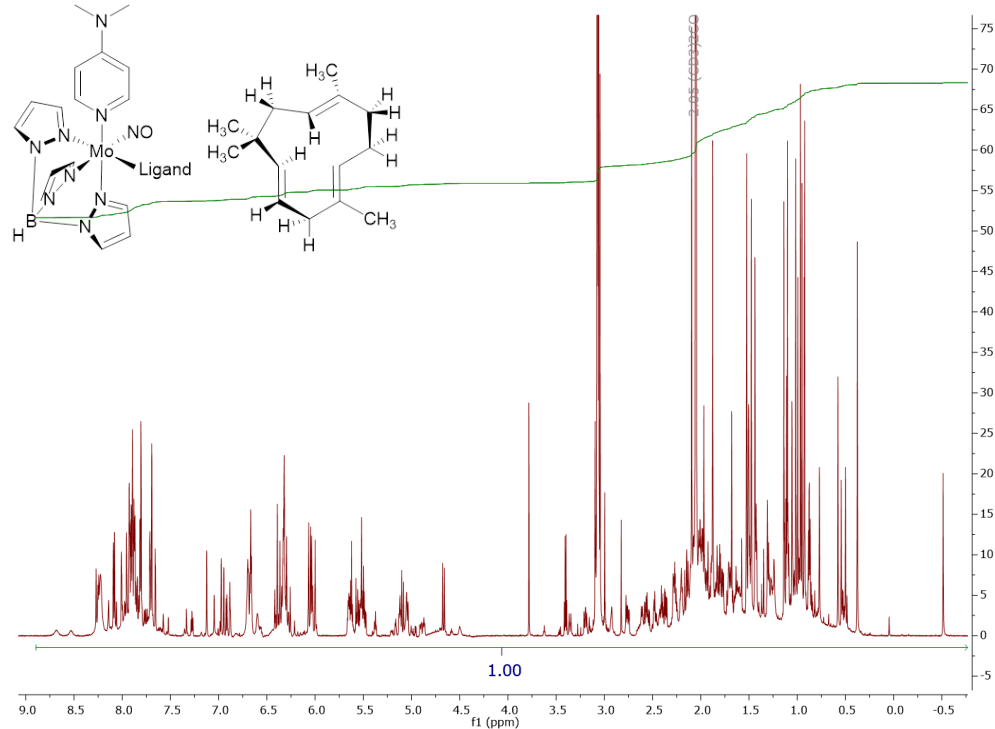**Figure S35.**  $^1\text{H}$  NMR ( $d^6$ -Acetone) of  $\alpha$ -Humulene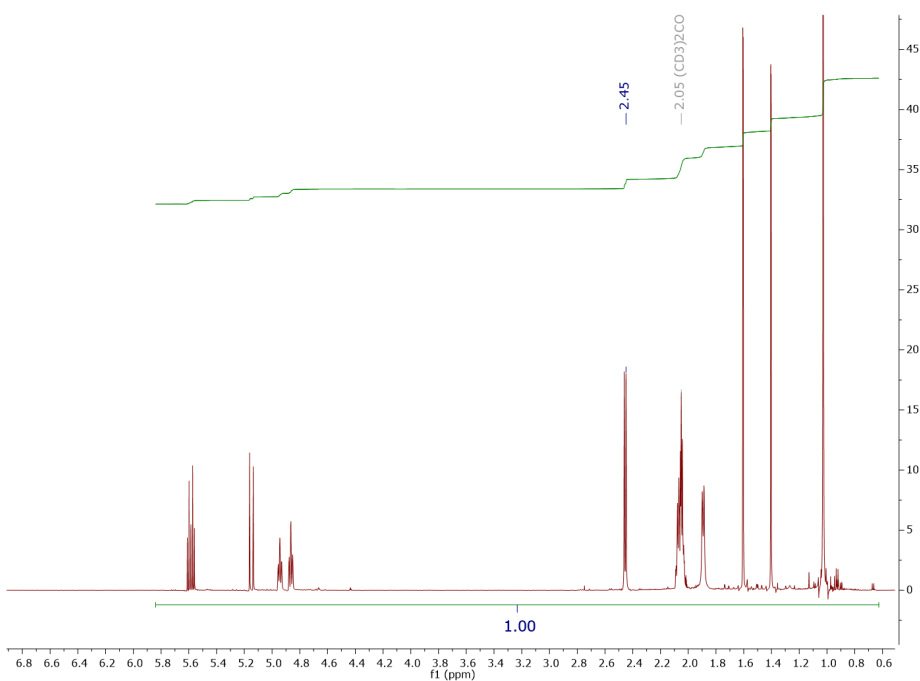

**Figure S36.**  $^1\text{H}$  NMR ( $\text{d}^6$ -Acetone) of **12A** (Free ligand impurity in sample)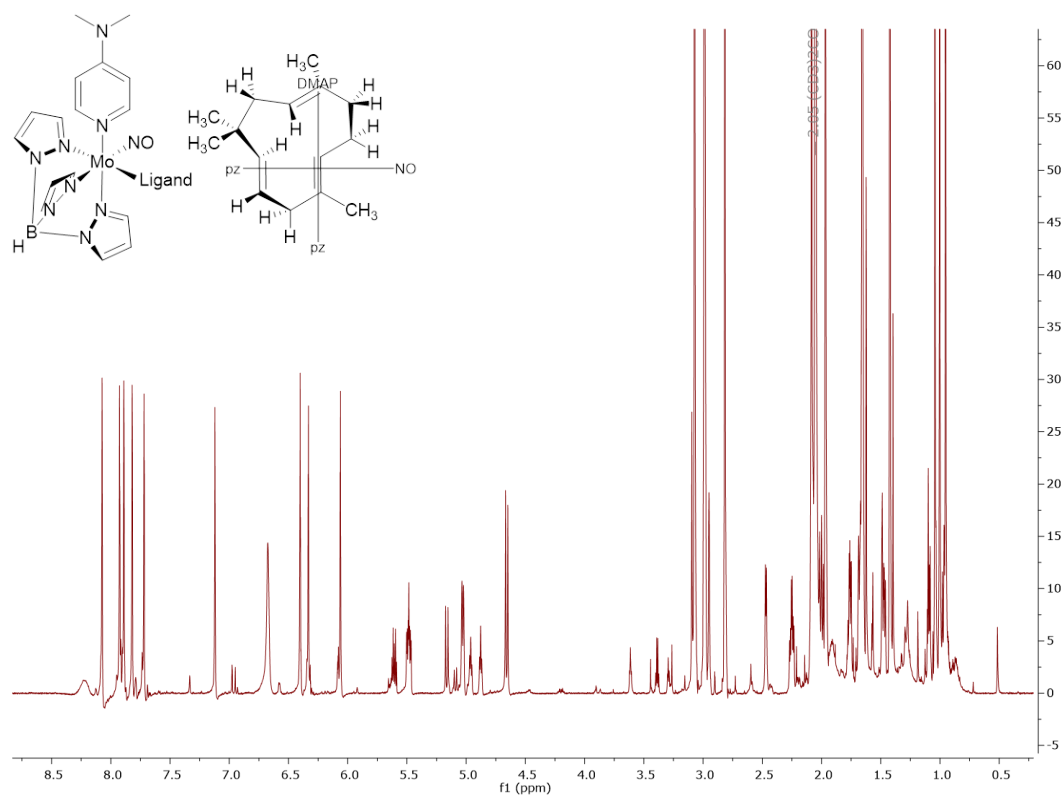**Figure S37.**  $^{13}\text{C}$  NMR ( $\text{d}^6$ -Acetone) of **12A** (Free ligand impurity in sample)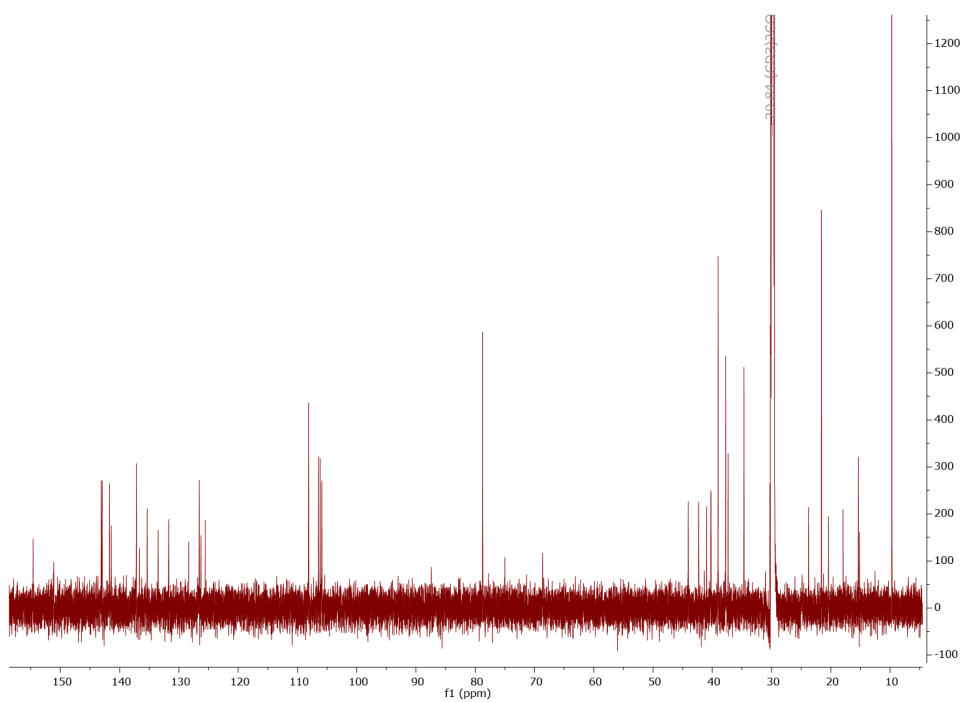

Figure S38. CV of 12

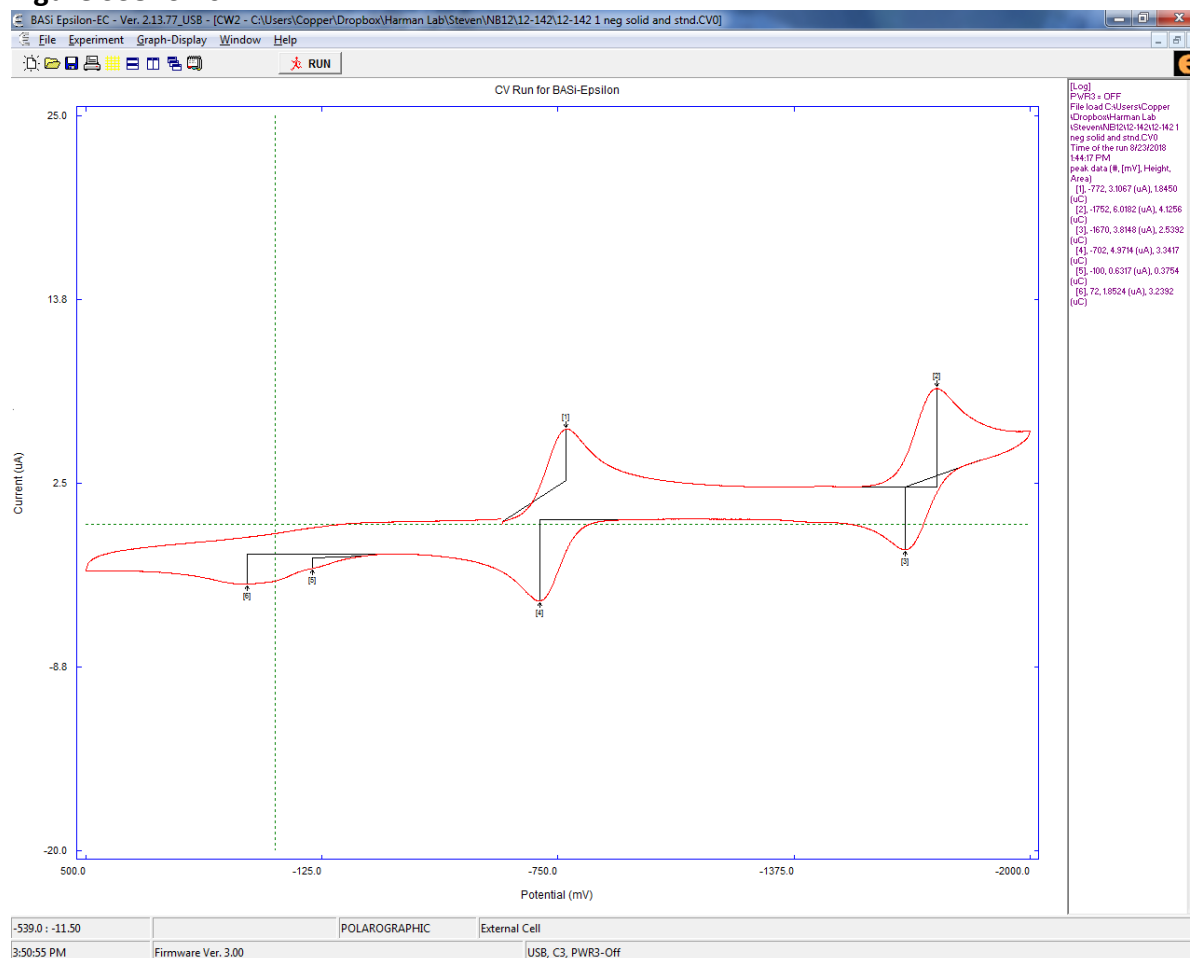

Figure S39. IR of 12

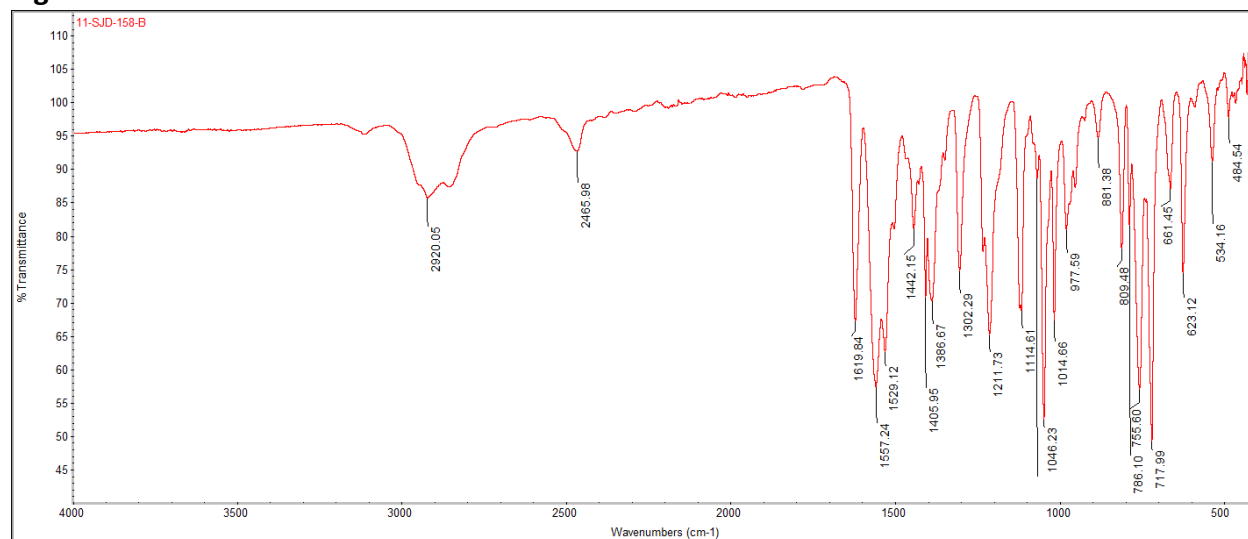

**(MoTp(NO-Me)(DMAP)( $\eta^2$ - $\alpha$ -Humulene))(OTf) (**12A**•CH<sub>3</sub>)**

**Figure S40.** <sup>1</sup>H NMR (d<sup>6</sup>-Acetone) of **12A** • Me (impure due to decomposition and free ligand ejection)

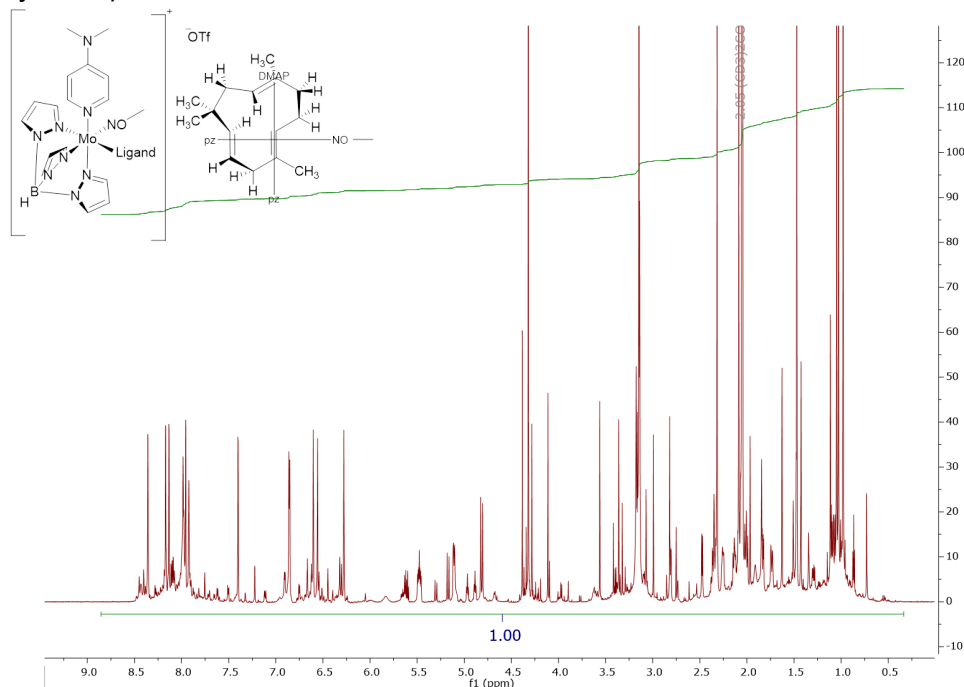

**Figure S41.** <sup>13</sup>C NMR (d<sup>6</sup>-Acetone) of **12A** • Me (Marked peaks are complex, Free ligand impurity in sample)

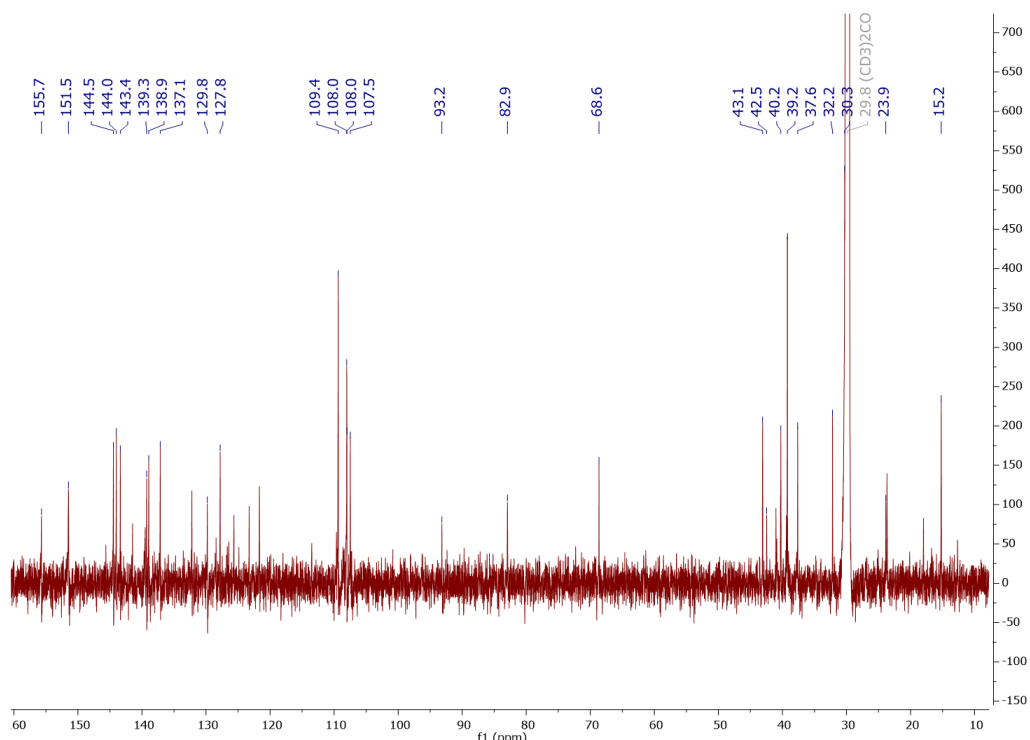

Figure S42. CV of 12A • Me

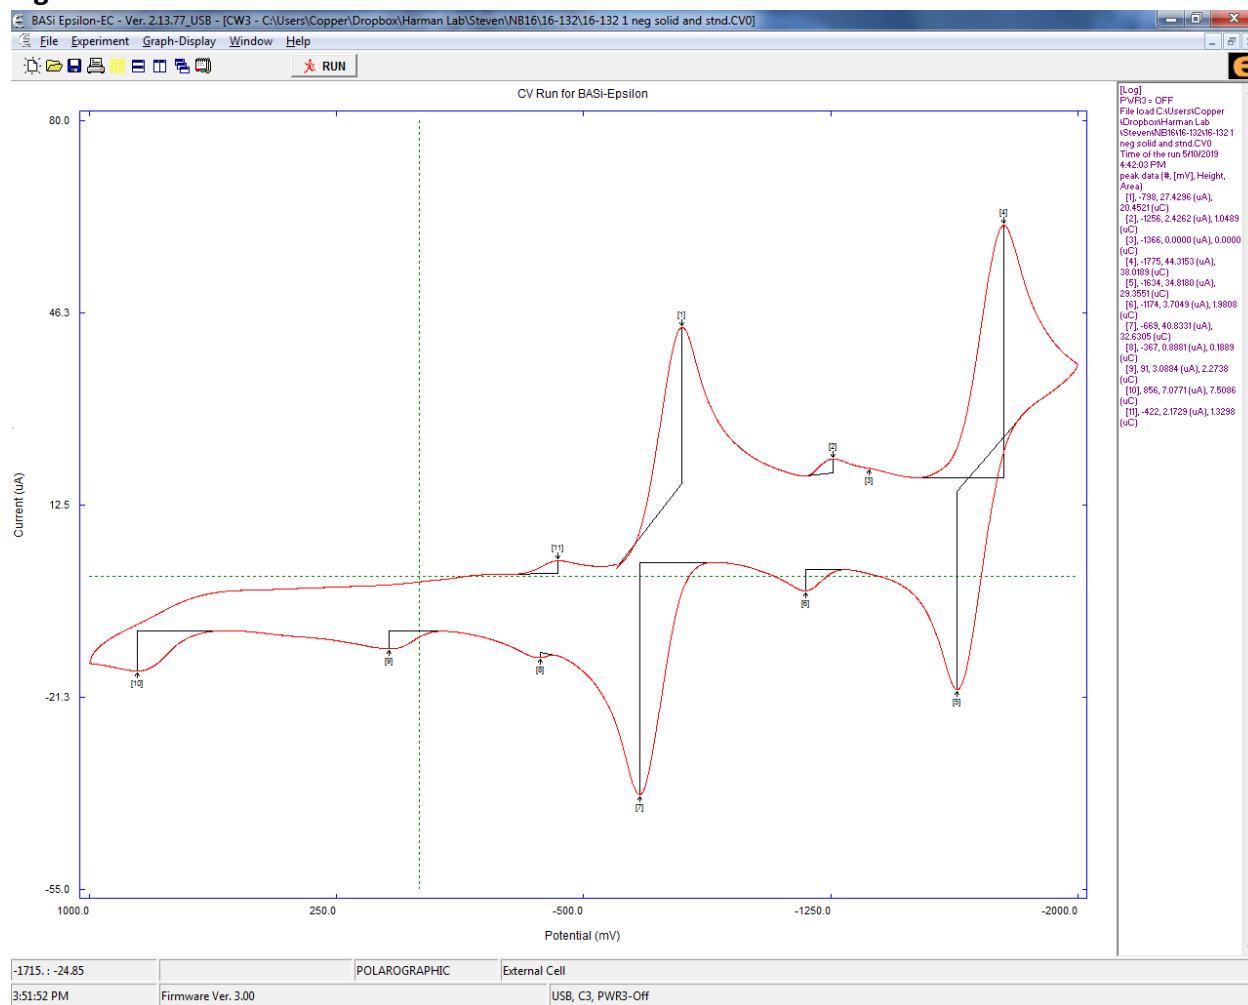

Figure S43. IR of 12A • Me

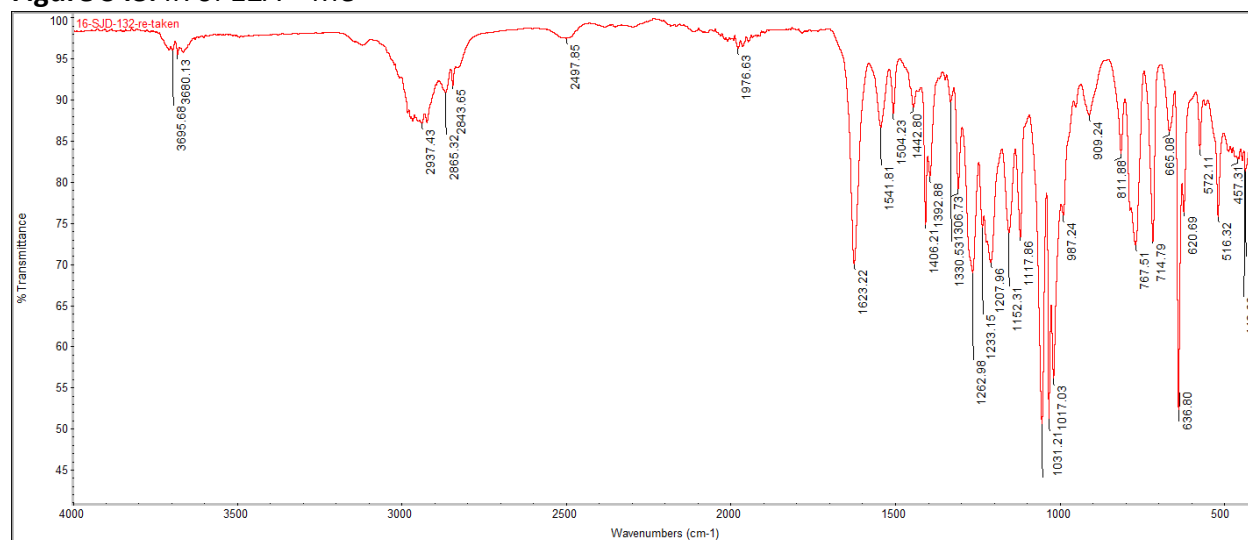



**WTP(NO)(PMe<sub>3</sub>)( $\eta^2$   $\alpha$ -humulene) (13)****Figure S44.** <sup>1</sup>H NMR (d<sup>6</sup>-Acetone) of **13**, mix of isomers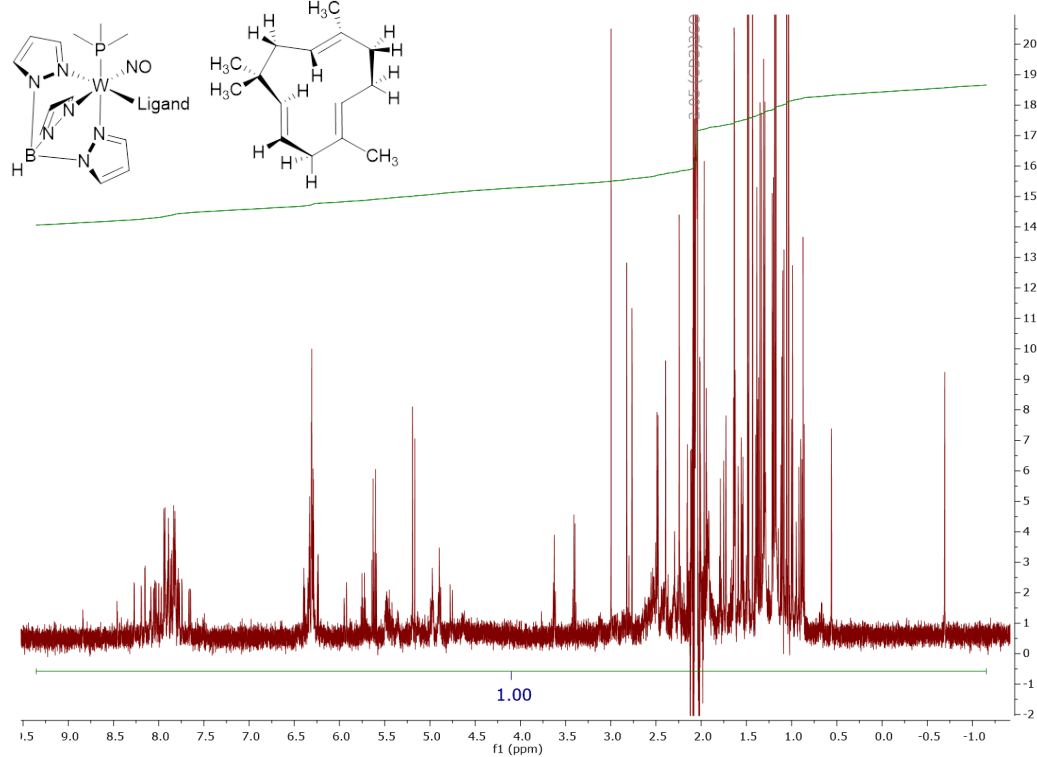

Figure S45. CV of 13

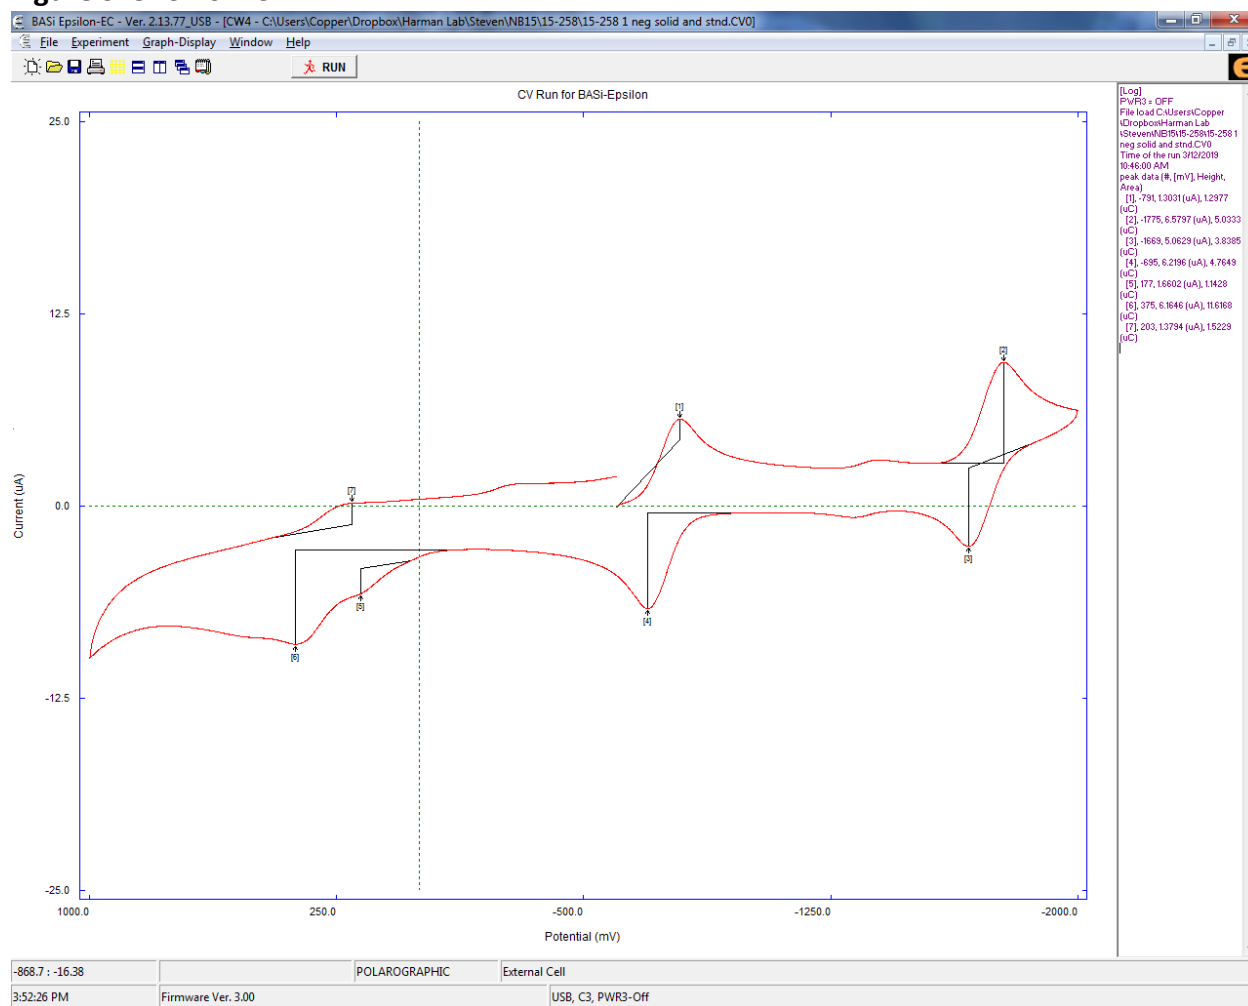

Figure S46. IR of 13

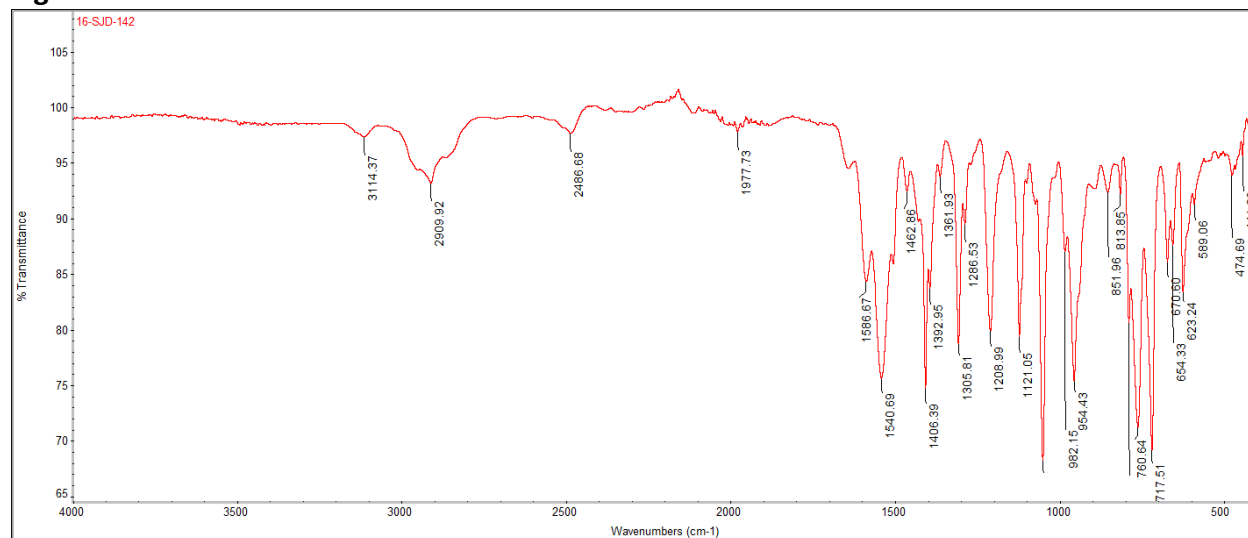

**Figure S47.**  $^1\text{H}$  NMR ( $d^6$ -Acetone) of **13A** (Singlet at 1.65 is permethylferrocene impurity and some free ligand is present)

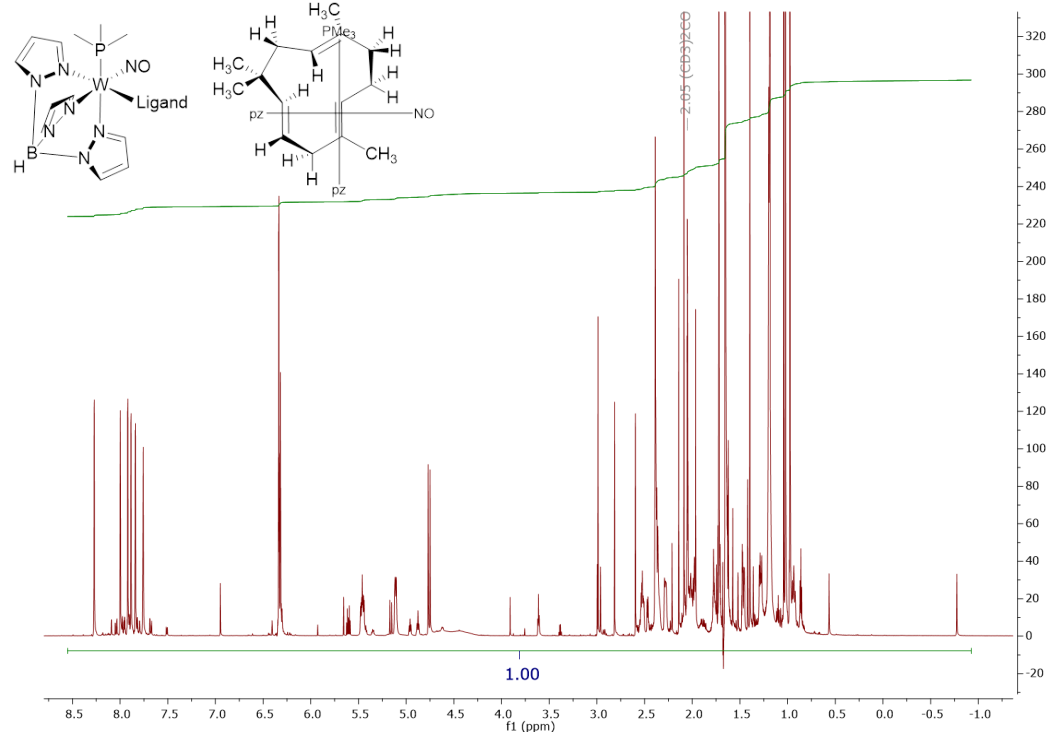

**Figure S48.**  $^{13}\text{C}$  NMR ( $d^6$ -Acetone) of **13A** (Signals marked are permethylferrocene impurity and some free ligand is present)

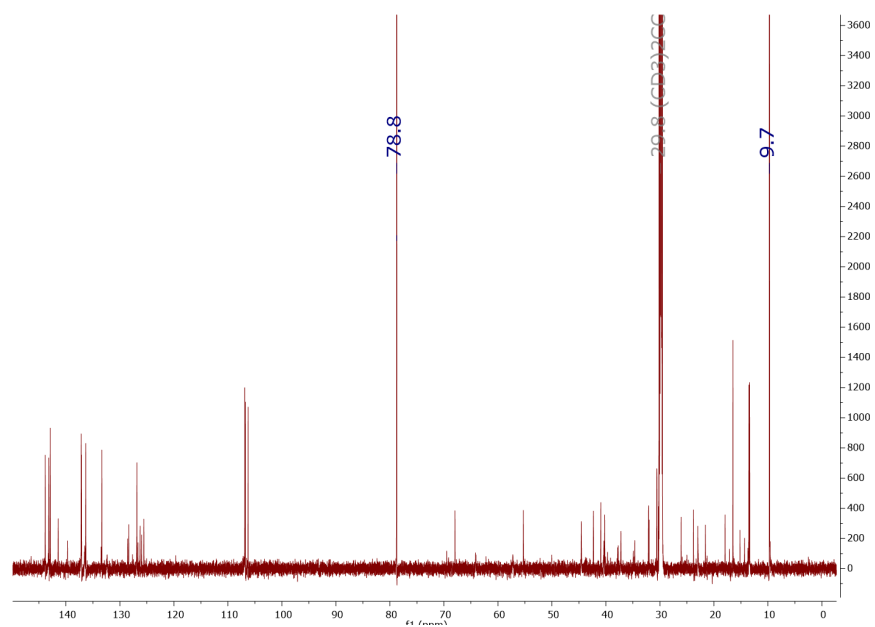

**MoTp(NO)(DMAP)( $\eta^2$ -Cyclopentene) (14)****Figure S49.**  $^1\text{H}$  NMR ( $d^6$ -Acetone) of **14**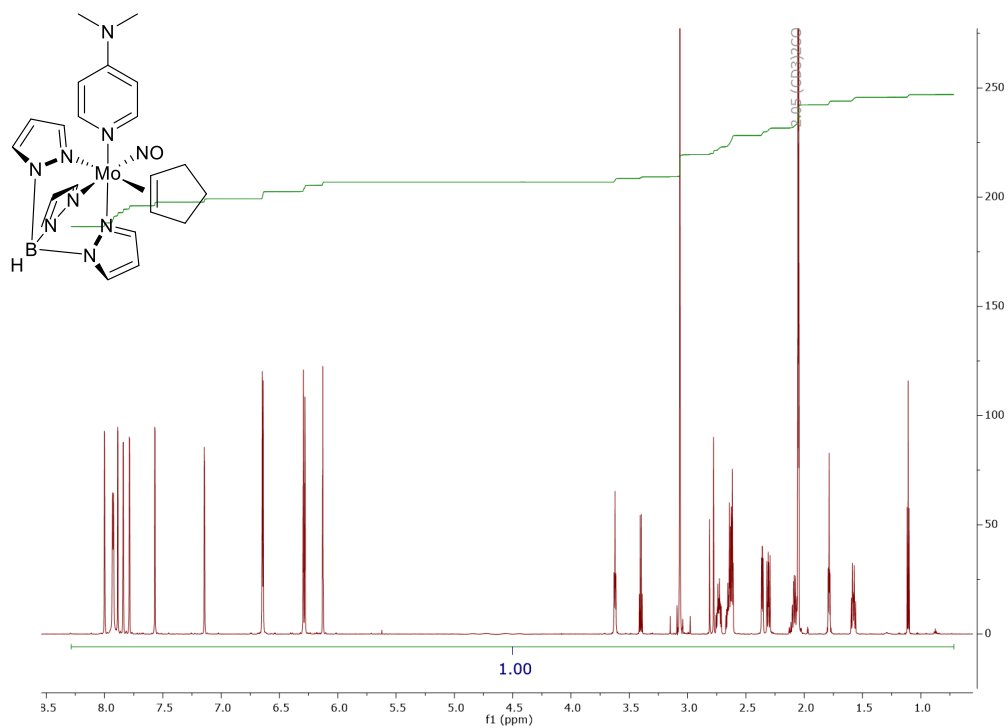**Figure S50.**  $^{13}\text{C}$  NMR ( $d^6$ -Acetone) of **14**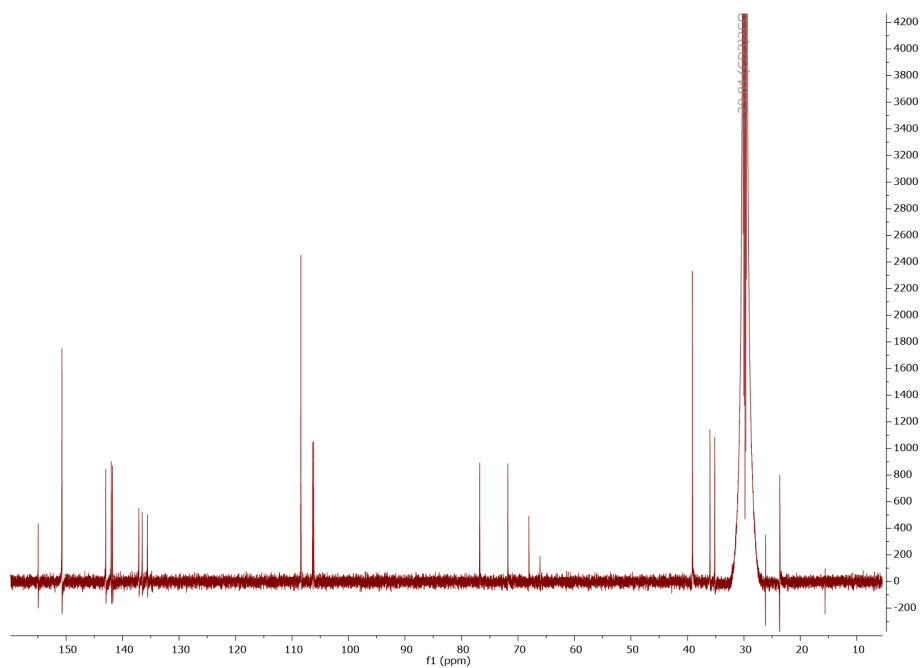

## CV of 14

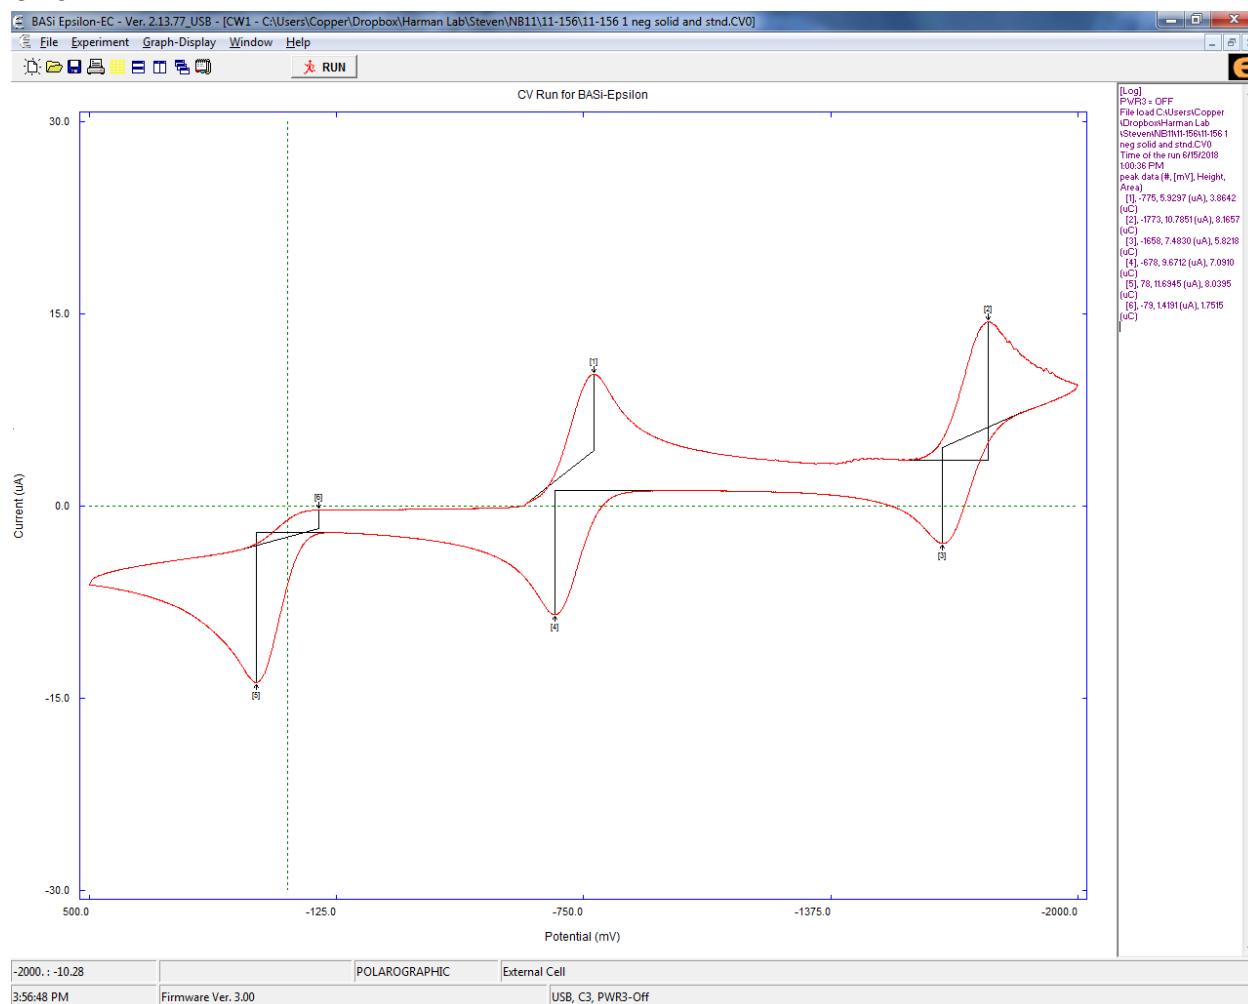

## IR of 14

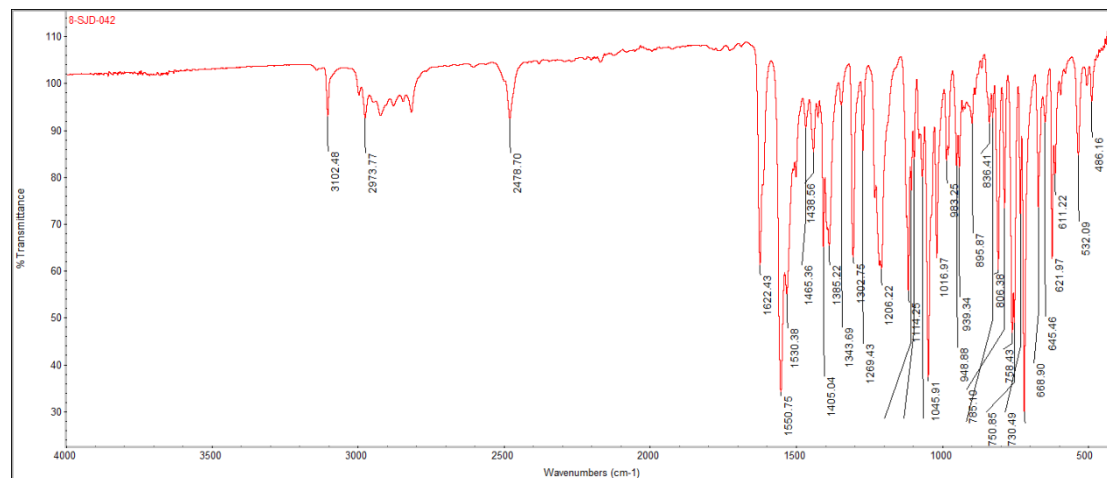

## Crystallography supporting information

Single crystals of **9a** and **14** were coated with Paratone oil and mounted on a MiTeGen MicroLoop. The X-ray intensity data were measured on a Bruker Kappa APEXII Duo system equipped with a graphite monochromator and a Mo K $\alpha$  fine-focus sealed tube ( $\lambda = 0.71073$  Å). The frames were integrated with the Bruker SAINT software package<sup>1</sup> using a narrow-frame algorithm. Data were corrected for absorption effects using the Multi-Scan method (SADABS).<sup>1</sup> The structure was solved and refined using the Bruker SHELXTL Software Package<sup>2</sup> within APEX3<sup>1</sup> and OLEX2.<sup>3</sup> Non-hydrogen atoms were refined anisotropically. The B-H hydrogen atom in **9a-centro** and **14** were located in the diffraction map and refined isotropically. All other hydrogen atoms were placed in geometrically calculated positions with  $U_{iso} = 1.2U_{equiv}$  of the parent atom ( $U_{iso} = 1.5 U_{equiv}$  for methyl).

In **9Acentro**, two carbon atoms of the limonene fragment were found to be disordered. The relative occupancies were freely refined, converging at 52/48 for the major and minor orientations of the limonene respectively. No constraints or restraints were used. The co-crystallized pentane solvent in **9Acentro** was disordered by symmetry and was refined with constraints on the thermal displacement parameters of the disordered atoms and restraints on the disordered bond lengths. In **9A-noncentro**, Non-hydrogen atoms were refined anisotropically with EADP constraints on most of the pseudo-symmetrically related atoms. During the refinement of **14**, electron density difference maps revealed that there was disordered solvent that could not be successfully modeled with or without restraints. Thus, the structure factors were modified using the PLATON SQUEEZE<sup>4</sup> technique, in order to produce a “solvate-free” structure factor set. PLATON reported a total electron density of 88 e<sup>-</sup> and total solvent accessible volume of 221 Å<sup>3</sup>, likely representing one dichloromethane molecule per asymmetric unit.

<sup>1</sup> Bruker (2012). *Saint*; *SADABS*; *APEX3*. Bruker AXS Inc., Madison, Wisconsin, USA.

<sup>2</sup> Sheldrick, G. M. (2015). *Acta Cryst.* **A71**, 3-8.

<sup>3</sup> Dolomanov, O. V.; Bourhis, L. J.; Gildea, R. J.; Howard, J. A. K.; Puschmann, H. *J. Appl. Cryst.* (2009). **42**, 339-341.

<sup>4</sup> Spek, A. L. *Acta Crystallogr. Sect C: Struct. Chem.* **2015**, *C71*, 9-18.

Crystal Data **Table S1.**

|                                            | <b>9A<br/>(centrosymmetric)</b>                                                               | <b>9A (non-centrosym)</b>                                                                     | <b>14</b>                                           |
|--------------------------------------------|-----------------------------------------------------------------------------------------------|-----------------------------------------------------------------------------------------------|-----------------------------------------------------|
| <b>CCDC</b>                                | 1971582                                                                                       | 1971583                                                                                       | 1971584                                             |
| <b>Chemical formula</b>                    | C <sub>57</sub> H <sub>84</sub> B <sub>2</sub> Mo <sub>2</sub> N <sub>18</sub> O <sub>2</sub> | C <sub>57</sub> H <sub>84</sub> B <sub>2</sub> Mo <sub>2</sub> N <sub>18</sub> O <sub>2</sub> | C <sub>21</sub> H <sub>28</sub> BMoN <sub>9</sub> O |
| <b>FW (g/mol)</b>                          | 1266.92                                                                                       | 1266.92                                                                                       | 529.27                                              |
| <b>T (K)</b>                               | 100(2)                                                                                        | 100(2)                                                                                        | 150(2)                                              |
| <b>Crystal size (mm)</b>                   | 0.060 x 0.106 x 0.285                                                                         | 0.040 x 0.076 x 0.202                                                                         | 0.254 x 0.488 x 0.548                               |
| <b>Crystal habit</b>                       | yellow rod                                                                                    | yellow plate                                                                                  | yellow block                                        |
| <b>Crystal system</b>                      | triclinic                                                                                     | triclinic                                                                                     | monoclinic                                          |
| <b>Space group</b>                         | P -1                                                                                          | P 1                                                                                           | P 2 <sub>1</sub> /n                                 |
| <b>a (Å)</b>                               | 8.8194(6)                                                                                     | 8.8141(7)                                                                                     | 11.4512(8)                                          |
| <b>b (Å)</b>                               | 9.6136(7)                                                                                     | 9.6056(8)                                                                                     | 17.1393(12)                                         |
| <b>c (Å)</b>                               | 20.2847(16)                                                                                   | 20.2594(16)                                                                                   | 12.8859(9)                                          |
| <b>α (°)</b>                               | 85.461(2)                                                                                     | 85.485(2)                                                                                     | 90                                                  |
| <b>β (°)</b>                               | 78.641(2)                                                                                     | 78.635(2)                                                                                     | 99.6970(10)                                         |
| <b>γ (°)</b>                               | 66.511(2)                                                                                     | 66.512(2)                                                                                     | 90                                                  |
| <b>V (Å<sup>3</sup>)</b>                   | 1546.5(2)                                                                                     | 1542.3(2)                                                                                     | 2492.9(3)                                           |
| <b>Z</b>                                   | 1                                                                                             | 1                                                                                             | 4                                                   |
| <b>ρ<sub>calc</sub> (g/cm<sup>3</sup>)</b> | 1.360                                                                                         | 1.364                                                                                         | 1.410                                               |
| <b>μ (mm<sup>-1</sup>)</b>                 | 0.462                                                                                         | 0.463                                                                                         | 0.557                                               |
| <b>θ range (°)</b>                         | 2.05 to 26.41                                                                                 | 2.05 to 28.34                                                                                 | 2.00 to 29.60                                       |
| <b>Index ranges</b>                        | -11 ≤ h ≤ 11<br>-12 ≤ k ≤ 12<br>-25 ≤ l ≤ 25                                                  | -11 ≤ h ≤ 11<br>-12 ≤ k ≤ 12<br>-27 ≤ l ≤ 26                                                  | -15 ≤ h ≤ 15<br>-23 ≤ k ≤ 22<br>-17 ≤ l ≤ 17        |
| <b>Reflns coll.</b>                        | 29888                                                                                         | 57234                                                                                         | 29694                                               |
| <b>Ind. rflns</b>                          | 6336 [R(int) = 0.0420]                                                                        | 15322 [R(int) = 0.0691]                                                                       | 6992 [R(int) = 0.0380]                              |
| <b>Data / restraints / parameters</b>      | 6336 / 28 / 413                                                                               | 15322 / 3 / 464                                                                               | 6992 / 0 / 304                                      |
| <b>Goodness-of-fit on F<sup>2</sup></b>    | 1.116                                                                                         | 1.030                                                                                         | 1.137                                               |
| <b>R<sub>1</sub> [I &gt; 2σ(I)]</b>        | 0.0303                                                                                        | 0.0465                                                                                        | 0.0319                                              |
| <b>wR<sub>2</sub> [all data]</b>           | 0.0610                                                                                        | 0.0877                                                                                        | 0.0805                                              |
